# Supplementary material
Source: ML conference proceedings conference paper supplement (https://openreview.net/forum?id=DSo2Zteb9l8)
Supplement: supplementary_material [file attachment]

## 580 A Task Description

Table 3: Configuration of environments.

| Environment    | Observation Shape | Action Shape | Have Done | Max Timesteps |
|----------------|-------------------|--------------|-----------|---------------|
| HalfCheetah-v3 | 18                | 6            | False     | 1000          |
| Hopper-v3      | 12                | 3            | True      | 1000          |
| Walker2d-v3    | 18                | 6            | True      | 1000          |
| IB             | 180               | 3            | False     | 1000          |
| FinRL          | 181               | 30           | False     | 2516          |
| CL             | 74                | 14           | False     | 1000          |

581 **MuJoCo** We set `EXCLUDE_CURRENT_POSITIONS_FROM_OBSERVATION` to false to include  
 582 the first dimension of the position in HalfCheetah-v3, Walker2d-v3, and Hopper-v3. We use Gym-  
 583 MuJoCo: <https://gym.openai.com/envs/#mujoco>.

584 **IB** IB [29] simulates the characteristics presented in various industrial control tasks, such as wind or  
 585 gas turbines, chemical reactors, etc. The raw system output for each time step is a 6-dimensional  
 586 vector including velocity, gain, shift, setpoint, consumption, and fatigue. To enhance the Markov  
 587 property, the authors stitch the system outputs of the last  $K$  timesteps as observations ( $K = 30$  by  
 588 default). The action space is three-dimensional. Each action can be interpreted as three proposed  
 589 changes to the three observable state variables called current steerings. Original codes can be found  
 590 at <https://github.com/siemens/industrialbenchmark>.

591 **FinRL** FinRL [30] contains 30 stocks in the pool and the trading histories over the past 10 years.  
 592 Each stock is represented as a 6-dimensional feature vector, where one dimension is the number  
 593 of stocks currently owned, another five dimensions are the factor information of that stock. The  
 594 observation has one dimension of information representing the current account cash balance. The  
 595 dimension of the action space is 30, corresponding to the transactions of each of the thirty stocks.  
 596 Original codes can be found at <https://github.com/AI4Finance-LLC/FinRL-Library>.

597 **CityLearn** The CityLearn (CL) environment [31] reshapes the aggregation curve of electricity  
 598 demand by controlling energy storage in different types of buildings. Domestic hot water (DHW) and  
 599 solar power demands are modeled in the CL environment. High electricity demand raises the price of  
 600 electricity and the overall cost of the distribution network. Flattening, smoothing, and narrowing the  
 601 electricity demand curve help to reduce the operating and capital costs of generation, transmission,  
 602 and distribution. The observation encodes the states of buildings, including time, outdoor temperature,  
 603 indoor temperature, humidity, solar radiation, power consumption, charging status of the cooling and  
 604 heating storage units, etc. The action is to control each building to increase or decrease the amount  
 605 of energy stored in its own heat storage and cooling equipment. Original codes can be found at  
 606 <https://github.com/intelligent-environments-lab/CityLearn>.

607 The state and action spaces of all environments are summarized in Table 3. Have Done means the  
 608 respective environment provides a terminal function that will finish the episode before reaching the  
 609 maximum timesteps.

## 610 B The Verification of Re-implementation

611 The reproducibility issue is critical in offline RL. Even if using codes from the original authors, we  
 612 may have difficulty reproducing the results for some algorithms on previous benchmarks. Random  
 613 seeds and which model to keep seem to matter a lot. Since we aim to use the same training workflow,  
 614 we re-implement compared baselines and have verified our re-implementations on D4RL MuJoCo-  
 615 medium tasks. The hyper-parameters are set to the recommended values in the original papers. The  
 616 results are shown in Table.4. Note that, in order to make a fair comparison between BREMEN and  
 617 MOPO, we use the same implementation of stochastic ensemble models. However, we do notice  
 618 that the original implementation of BREMEN adopted deterministic models, which may cause a  
 619 discrepancy in the results.

Table 4: Normalized scores of the re-implementations on D4RL. Values in the brackets state the reported score in the original papers (except for CRR whose scores on D4RL are not available). The difference between two scores greater than 10 are in bold.

| Task Name          | CQL                | PLAS        | BCQ                | CRR  | BREMEN             | MOPO               |
|--------------------|--------------------|-------------|--------------------|------|--------------------|--------------------|
| Walker2d-medium    | <b>78.5</b> (58.0) | 70.9 (66.9) | <b>69.0</b> (53.1) | 30.2 | <b>29.8</b> (59.6) | <b>27.6</b> (14.0) |
| Hopper-medium      | 78.3 (79.2)        | 34.2 (36.9) | <b>32.0</b> (54.5) | 53.3 | <b>29.7</b> (69.3) | 21.9 (26.5)        |
| HalfCheetah-medium | 41.5 (44.4)        | 40.9 (42.2) | 43.2 (40.7)        | 39.8 | 50.2 (55.0)        | 39.3 (40.2)        |

## C Computation Resources

We run all the experiments on the local clusters with multiple NVIDIA Telsa V100 GPUs (10 times CPU cores). By rough calculation, training all the offline policies require 21,420 GPU hours, and evaluating them with OPEs requires 15,300 GPU hours.

## D Choice of Hyper-parameters

To make a fair comparison, all the policies and value functions are implemented by the same network structure, i.e., an MLP with 2 hidden layers and 256 units per layer. Because network architecture search (NAS) consumes large computation resources, especially in offline RL, since it takes a long time to train a policy and the ground-truth performance relies on online interactions. Thus, we directly use the same network architecture as the behavior policy that produced the datasets, and they do learn something in the online training process. We hope future work will enrich the property network architecture for offline RL. The output of the policies is transformed by  $\tanh$  function to ensure the actions are within the range. For model-based approaches, the transition model is represented by an ensemble of Gaussian models, i.e., for each model,  $s_{t+1} \sim \mathcal{N}(s_t + \Delta_\theta(s_t, a_t), \sigma_\theta(s_t, a_t))$ , where  $\Delta_\theta$  and  $\sigma_\theta$  are implemented by an MLP with 4 hidden layers and two heads. For Gym-MoJuCo tasks, we use 256 units in each hidden layer, for other tasks with higher input dimensions, we use 1024 units. Each transition model is trained by Adam optimizer via maximum likelihood until the MSE plateaus on the test dataset.

For BC, the policies are trained by Adam optimizer with a learning rate of  $1e-3$  for  $100K$  steps with a batch size of 256, and it is early stopped with the lowest MSE on the test dataset to prevent overfitting. Although the best policy may get from the middle of the training process, except for BC, there does not exist a decent criterion to early stop. Thus, we only consider the finally trained policy for evaluation.

For BREMEN, we follow the original settings to treat 25 TRPO steps as an epoch and train for 250 epochs. For other methods, we treat 1000 learning steps as an epoch and then train BCQ, PLAS, CRR, MOPO for 200 epochs and train CQL for 300 epochs (The original CQL used 3000 epochs, but it spends too much time and the best performance can occur before 300 epochs).

Except for BC, offline RL algorithms can be very sensitive to the choice of hyper-parameters. To evaluate the performance of these algorithms, we conduct grid searches for the important hyper-parameters noted by the original papers. The search space of these algorithms is summarized in Table 5 and the hyper-parameters used in the reported results are summarized in Table 6. For parameters not mentioned, their values are the same as the original papers.

For BCQ, the action is decoded from VAE plus a perturbation, i.e.,  $a = \hat{a} + \Phi \tanh(\xi_\phi(s, \hat{a}))$ . Here,  $\Phi$  controls the maximum deviation allowed for the learned policy from the behavior policy. We search for  $\Phi \in \{0.05, 0.1, 0.2, 0.5\}$ .

For PLAS, the default setting is to learn a deterministic policy in the latent space of VAE. The authors mentioned that a similar perturbation layer as BCQ can be applied to the output action to improve its generalization out of the dataset. Thus, we search for the value of  $\Phi \in \{0, 0.05, 0.1, 0.2, 0.5\}$ , where  $\Phi = 0$  stands for the perturbation is not applied.

For CQL, we mainly consider three parameters mentioned in the original paper:

Table 5: The search space of hyper-parameters.

| Algorithms | Search Space                                                                                                           |
|------------|------------------------------------------------------------------------------------------------------------------------|
| BCQ        | $\Phi \in \{0.05, 0.1, 0.2, 0.5\}$                                                                                     |
| PLAS       | $\Phi \in \{0, 0.05, 0.1, 0.2, 0.5\}$                                                                                  |
| CQL        | variant $\in \{\mathcal{H}, \rho\}$<br>$\alpha \in \{5, 10\}$<br>$\tau \in \{-1, 2, 5, 10\}$                           |
| CRR        | advantage mode $\in \{\max, \text{mean}\}$<br>weight mode $\in \{\text{exp}, \text{binary}\}$                          |
| BREMEN     | $h \in \{250, 1000\}$<br>exploration mode $\in \{\text{sample}, \text{static}\}$                                       |
| MOPO       | uncertainty type $\in \{\text{aleatoric}, \text{disagreement}\}$<br>$h \in \{1, 5\}$<br>$\lambda \in \{0.5, 1, 2, 5\}$ |

- Variant: The paper proposed two variants of CQL algorithms, i.e., CQL( $\mathcal{H}$ ) and CQL( $\rho$ ). The former uses entropy as the regularizer, whereas the latter one uses KL-divergence.
- Q-values penalty parameter  $\alpha$ : In the formulation of CQL,  $\alpha$  stands for how large penalty will be enforced on the Q function. As suggested in the paper, we search for  $\alpha \in \{5, 10\}$ .
- $\tau$ : Since  $\alpha$  can be hard to tune, the authors also introduce an auto-tuning trick via dual gradient-descent. The trick introduces a threshold  $\tau > 0$ . When the difference between Q-values is greater than  $\tau$ ,  $\alpha$  will be auto-tuned to a greater value to make the penalty more aggressive. As suggested by the paper, we search  $\tau \in \{-1, 2, 5, 10\}$ .  $\tau = -1$  indicates removing this trick.

Note that, there is an approximate-max backup trick mentioned in the original paper. By default, the bellman backup is computed with double Q, i.e.,  $y = r + \min_{i=1,2} Q_i(s', a')$ , where  $a' \sim \pi(s')$ . In addition, the authors propose a approximate-max backup, which use 10 samples to approximate the max Q-values, where the backup is computed by  $y = r + \min_{i=1,2} \max_{a'_1 \dots a'_{10} \sim \pi(s')} Q_i(s', a')$ . In the former experiments, we found this trick impairs the performance. Thus, we keep the double-Q target to reduce the search space.

In CRR, the policy is learned via  $\arg \max_{\pi} \mathbb{E}_{(s,a) \sim D} [f(Q_{\theta}, \pi, s, a) \log \pi(a|s)]$ , where  $f$  is the weight function that is non-negative and monotonous in Q value. The authors mainly use the advantage function to compute  $f$ . There are mainly two design choices that effect  $f$ :

- Advantage mode: The original paper gives two methods to estimate the advantage function, i.e.,  $\hat{A}_{\text{mean}}(s, a) = Q_{\theta}(s, a) - \frac{1}{m} \sum_{i=1}^m Q_{\theta}(s, a_i)$  and  $\hat{A}_{\text{max}}(s, a) = Q_{\theta}(s, a) - \max_{i=1 \dots m} Q_{\theta}(s, a_i)$ , where  $a_i \sim \pi(a|s)$ . The former one is termed as *mean* while the later one is termed *max*.
- Weight mode: The original paper gives two ways to compute weight given advantage, i.e.,  $f := \mathbb{1} [\hat{A}(s, a) > 0]$  and  $f := \exp(\hat{A}(s, a)/\beta)$ . The former one is termed as *binary* while the later one is termed *exp*. For the *exp* method, the  $\beta$  is set to 1 to be align with the original paper.

For BREMEN, we consider two parameters mentioned in the original paper:

- Rollout horizon  $h$ : BREMEN uses the transition models to generate imaginary rollouts whose length is controlled by parameter  $h$ . As suggested in the original paper, we search for  $h \in \{250, 1000\}$ .
- Exploration Mode: In the original paper, the authors conducted an ablation study on the exploration strategy when generating rollouts. They found using a stationary Gaussian noise with  $\sigma = 0.1$  other than sampling from the policy can significantly boost the performance. However, in our experiment, we observe that using stationary noise does not always help.

Table 6: Hyper-parameters for reported results.

| Task Name                     | BCQ    | PLAS   | CQL           |          |        | CRR            |             | BREMEN |                  | MOPO             |     |           |
|-------------------------------|--------|--------|---------------|----------|--------|----------------|-------------|--------|------------------|------------------|-----|-----------|
|                               | $\Phi$ | $\Phi$ | Variant       | $\alpha$ | $\tau$ | Advantage Mode | Weight Mode | $h$    | Exploration Mode | Uncertainty Type | $h$ | $\lambda$ |
| HalfCheetah-L-10 <sup>2</sup> | 0.05   | 0.05   | $\mathcal{H}$ | 5        | 2      | mean           | exp         | 250    | sample           | aleatoric        | 5   | 1.0       |
| HalfCheetah-L-10 <sup>3</sup> | 0.2    | 0.05   | $\mathcal{H}$ | 10       | 10     | mean           | exp         | 250    | sample           | aleatoric        | 5   | 1.0       |
| HalfCheetah-L-10 <sup>4</sup> | 0.5    | 0.05   | $\mathcal{H}$ | 5        | 10     | max            | binary      | 250    | sample           | disagreement     | 1   | 1.0       |
| HalfCheetah-M-10 <sup>2</sup> | 0.05   | 0.0    | $\rho$        | 10       | -1     | mean           | binary      | 1000   | sample           | aleatoric        | 5   | 1.0       |
| HalfCheetah-M-10 <sup>3</sup> | 0.05   | 0.0    | $\rho$        | 5        | -1     | mean           | binary      | 250    | sample           | aleatoric        | 5   | 2.0       |
| HalfCheetah-M-10 <sup>4</sup> | 0.05   | 0.0    | $\mathcal{H}$ | 10       | 5      | mean           | binary      | 250    | sample           | disagreement     | 1   | 5.0       |
| HalfCheetah-H-10 <sup>2</sup> | 0.05   | 0.0    | $\rho$        | 5        | 10     | max            | exp         | 1000   | sample           | aleatoric        | 5   | 5.0       |
| HalfCheetah-H-10 <sup>3</sup> | 0.05   | 0.0    | $\rho$        | 5        | 10     | mean           | binary      | 1000   | sample           | aleatoric        | 5   | 2.0       |
| HalfCheetah-H-10 <sup>4</sup> | 0.05   | 0.0    | $\rho$        | 10       | -1     | mean           | binary      | 1000   | static           | aleatoric        | 1   | 1.0       |
| Hopper-L-10 <sup>2</sup>      | 0.1    | 0.1    | $\mathcal{H}$ | 5        | 10     | max            | binary      | 250    | static           | aleatoric        | 1   | 1.0       |
| Hopper-L-10 <sup>3</sup>      | 0.1    | 0.5    | $\mathcal{H}$ | 5        | 10     | mean           | exp         | 250    | static           | disagreement     | 5   | 5.0       |
| Hopper-L-10 <sup>4</sup>      | 0.2    | 0.2    | $\mathcal{H}$ | 5        | 10     | max            | exp         | 250    | static           | disagreement     | 1   | 0.5       |
| Hopper-M-10 <sup>2</sup>      | 0.1    | 0.0    | $\rho$        | 10       | 10     | mean           | binary      | 1000   | static           | aleatoric        | 1   | 5.0       |
| Hopper-M-10 <sup>3</sup>      | 0.05   | 0.1    | $\mathcal{H}$ | 10       | -1     | max            | exp         | 250    | static           | disagreement     | 5   | 5.0       |
| Hopper-M-10 <sup>4</sup>      | 0.05   | 0.05   | $\mathcal{H}$ | 5        | 10     | mean           | exp         | 250    | static           | aleatoric        | 5   | 1.0       |
| Hopper-H-10 <sup>2</sup>      | 0.05   | 0.0    | $\rho$        | 5        | 10     | mean           | exp         | 250    | static           | aleatoric        | 1   | 0.5       |
| Hopper-H-10 <sup>3</sup>      | 0.2    | 0.0    | $\rho$        | 10       | -1     | mean           | binary      | 250    | static           | aleatoric        | 1   | 5.0       |
| Hopper-H-10 <sup>4</sup>      | 0.05   | 0.0    | $\mathcal{H}$ | 5        | -1     | mean           | binary      | 1000   | static           | disagreement     | 1   | 0.5       |
| Walker2d-L-10 <sup>2</sup>    | 0.05   | 0.0    | $\rho$        | 10       | 2      | mean           | exp         | 1000   | static           | disagreement     | 1   | 0.5       |
| Walker2d-L-10 <sup>3</sup>    | 0.2    | 0.0    | $\mathcal{H}$ | 5        | 10     | mean           | binary      | 1000   | static           | aleatoric        | 1   | 5.0       |
| Walker2d-L-10 <sup>4</sup>    | 0.05   | 0.0    | $\mathcal{H}$ | 10       | 5      | max            | exp         | 1000   | static           | aleatoric        | 1   | 0.5       |
| Walker2d-M-10 <sup>2</sup>    | 0.1    | 0.0    | $\mathcal{H}$ | 5        | -1     | max            | binary      | 1000   | static           | aleatoric        | 5   | 5.0       |
| Walker2d-M-10 <sup>3</sup>    | 0.2    | 0.0    | $\mathcal{H}$ | 10       | 2      | mean           | binary      | 1000   | static           | aleatoric        | 5   | 5.0       |
| Walker2d-M-10 <sup>4</sup>    | 0.05   | 0.0    | $\rho$        | 5        | -1     | mean           | binary      | 1000   | static           | aleatoric        | 5   | 2.0       |
| Walker2d-H-10 <sup>2</sup>    | 0.05   | 0.0    | $\rho$        | 5        | -1     | mean           | exp         | 1000   | static           | disagreement     | 1   | 2.0       |
| Walker2d-H-10 <sup>3</sup>    | 0.2    | 0.0    | $\rho$        | 5        | -1     | mean           | binary      | 1000   | static           | disagreement     | 1   | 2.0       |
| Walker2d-H-10 <sup>4</sup>    | 0.1    | 0.0    | $\rho$        | 10       | -1     | mean           | binary      | 250    | static           | disagreement     | 5   | 1.0       |
| IB-L-10 <sup>2</sup>          | 0.5    | 0.05   | $\rho$        | 10       | 10     | mean           | exp         | 1000   | sample           | aleatoric        | 5   | 5.0       |
| IB-L-10 <sup>3</sup>          | 0.5    | 0.2    | $\rho$        | 5        | 5      | mean           | exp         | 250    | sample           | disagreement     | 5   | 5.0       |
| IB-L-10 <sup>4</sup>          | 0.5    | 0.05   | $\rho$        | 10       | -1     | mean           | binary      | 250    | static           | aleatoric        | 5   | 2.0       |
| IB-M-10 <sup>2</sup>          | 0.5    | 0.5    | $\mathcal{H}$ | 10       | 2      | mean           | exp         | 250    | static           | aleatoric        | 1   | 2.0       |
| IB-M-10 <sup>3</sup>          | 0.2    | 0.0    | $\mathcal{H}$ | 5        | 5      | max            | exp         | 1000   | static           | aleatoric        | 1   | 0.5       |
| IB-M-10 <sup>4</sup>          | 0.5    | 0.0    | $\mathcal{H}$ | 5        | 2      | max            | binary      | 250    | static           | disagreement     | 1   | 1.0       |
| IB-H-10 <sup>2</sup>          | 0.5    | 0.2    | $\rho$        | 10       | 5      | mean           | exp         | 250    | static           | disagreement     | 5   | 2.0       |
| IB-H-10 <sup>3</sup>          | 0.05   | 0.5    | $\rho$        | 5        | 2      | mean           | exp         | 250    | static           | aleatoric        | 1   | 1.0       |
| IB-H-10 <sup>4</sup>          | 0.1    | 0.05   | $\rho$        | 10       | 5      | mean           | exp         | 250    | static           | aleatoric        | 5   | 2.0       |
| FinRL-L-10 <sup>2</sup>       | 0.5    | 0.5    | $\mathcal{H}$ | 5        | 2      | mean           | binary      | 250    | static           | aleatoric        | 1   | 0.5       |
| FinRL-L-10 <sup>3</sup>       | 0.5    | 0.2    | $\mathcal{H}$ | 10       | -1     | max            | exp         | 250    | sample           | aleatoric        | 1   | 0.5       |
| FinRL-M-10 <sup>2</sup>       | 0.1    | 0.5    | $\rho$        | 10       | 2      | mean           | binary      | 250    | static           | aleatoric        | 1   | 0.5       |
| FinRL-M-10 <sup>3</sup>       | 0.5    | 0.0    | $\rho$        | 10       | 10     | max            | exp         | 1000   | sample           | aleatoric        | 5   | 0.5       |
| FinRL-H-10 <sup>2</sup>       | 0.5    | 0.0    | $\mathcal{H}$ | 5        | 10     | max            | exp         | 250    | sample           | aleatoric        | 5   | 0.5       |
| FinRL-H-10 <sup>3</sup>       | 0.5    | 0.2    | $\rho$        | 10       | -1     | mean           | exp         | 250    | sample           | aleatoric        | 1   | 0.5       |
| CL-L-10 <sup>2</sup>          | 0.05   | 0.0    | $\mathcal{H}$ | 10       | 10     | mean           | binary      | 1000   | static           | disagreement     | 1   | 5.0       |
| CL-L-10 <sup>3</sup>          | 0.2    | 0.05   | $\mathcal{H}$ | 10       | -1     | mean           | binary      | 250    | static           | disagreement     | 1   | 2.0       |
| CL-L-10 <sup>4</sup>          | 0.1    | 0.1    | $\mathcal{H}$ | 10       | -1     | mean           | exp         | 1000   | sample           | aleatoric        | 5   | 1.0       |
| CL-M-10 <sup>2</sup>          | 0.2    | 0.05   | $\rho$        | 10       | 10     | mean           | exp         | 250    | static           | disagreement     | 5   | 0.5       |
| CL-M-10 <sup>3</sup>          | 0.2    | 0.0    | $\mathcal{H}$ | 10       | 2      | max            | binary      | 1000   | sample           | aleatoric        | 1   | 0.5       |
| CL-M-10 <sup>4</sup>          | 0.05   | 0.1    | $\mathcal{H}$ | 10       | 10     | max            | exp         | 250    | static           | aleatoric        | 1   | 5.0       |
| CL-H-10 <sup>2</sup>          | 0.05   | 0.0    | $\rho$        | 10       | 2      | mean           | exp         | 250    | static           | disagreement     | 5   | 0.5       |
| CL-H-10 <sup>3</sup>          | 0.1    | 0.0    | $\mathcal{H}$ | 10       | 10     | mean           | exp         | 250    | static           | aleatoric        | 5   | 1.0       |
| CL-H-10 <sup>4</sup>          | 0.05   | 0.0    | $\mathcal{H}$ | 10       | 2      | mean           | exp         | 250    | static           | aleatoric        | 5   | 5.0       |

Thus, we perform a search on this strategy. The term *sample* is referred to directly sample from the policy, while *static* is referred to the stationary noise suggested by the authors.

For MOPO, we consider three parameters mentioned in the original paper:

- **Uncertainty type:** In the default setting, MOPO uses the maximum  $L_2$ -norm of the output standard deviation among ensemble transition models, i.e.,  $\max_{i=1\dots N} \|\sigma_{\theta}^i(s, a)\|_2^2$ , as the uncertainty measure. Since the learned variance can theoretically recover the true aleatoric uncertainty [45, 9], we denote this type of uncertainty as aleatoric. Another variant that uses the disagreement between ensemble transition models is also included, i.e.,  $\max_{i=1\dots N} \|\Delta_{\theta}^i(s, a) - \frac{1}{N} \sum_i \Delta_{\theta}^i(s, a)\|_2^2$ . We refer to this variant as disagreement.
- **Rollout horizon  $h$ :** MOPO uses a branch rollout trick that rollouts from states in the dataset with a small length.  $h$  determines the length of the rollout. As suggested in the paper, we search for  $h \in \{1, 5\}$ .

- Uncertainty penalty weight  $\lambda$ : The main idea of MOPO is to penalize the reward function with the uncertainty term, i.e.,  $\hat{r} = r - \lambda u(s, a)$ . Here,  $\lambda$  control the amplitude of the penalty. As suggested in the original paper, we search for  $\lambda \in \{0.5, 1, 2, 5\}$ .

## E Details of Offline Policy Evaluation

This section describes implementation details and hyper-parameters for offline evaluation and provides additional results. Corresponding to supervised learning, all the OPE methods are conducted on the holdout test dataset with a discount factor  $\gamma = 0.99$ .

For FQE, we follow the hyper-parameters in [12]. The critic network is implemented with an MLP of 4 layers with 1024 units per layer and is trained for 250K steps by Adam optimizer with a batch size of 256. In the experiment, we observe that FQE is inclined to explode to extremely large values. Therefore, we use a value clipping trick on the target of bellman backups. The max and min values are computed by the rewards from the dataset with 40% enlargement of the interval. That is,  $v_{\max} = (1.2r_{\max} - 0.2r_{\min})/(1 - \gamma)$  and  $v_{\min} = (1.2r_{\min} - 0.2r_{\max})/(1 - \gamma)$ .

IS based methods rely on the probability density function of policies to compute the important ratio  $\rho = \frac{\pi(a|s)}{\pi_b(a|s)}$ . However, the behavior policy  $\pi_b(a|s)$  is unknown in the offline setting, and the target policy  $\pi(a|s)$ , i.e., the one trained by offline RL algorithms, can also be deterministic or stochastic with implicit distribution, as in BCQ and PLAS. Thus, we adopt BC to estimate the density function of the respective policy. For the behavior policy, BC is directly applied to the raw dataset. For the target policy, we first relabel the dataset by the output of the target policy, then apply BC on the relabeled dataset. We follow [46] to implement the WIS. The policy is implemented as a TanhGaussian distribution in BC with an MLP of 2 layers and 256 units per layer.

In addition to directly select the best policy according to the OPE estimations, we also consider other two metrics to evaluate the OPE methods as in [12, 13]:

**Rank Correlation Score (RC Score):** RC score indicates how the OPE produces the same rank as the ground-truth in the online evaluation. It is computed as Spearman correlation coefficient between the two rankings produced by OPE and online evaluation respectively. RC score lies in  $[-1, 1]$ , and if the rank is uniformly random, the score will be 0.

**Top- $K$  Score:** Top- $K$  score represents the relative performance of the chosen  $K$  policies via OPE. To compute this score, the real online performance of each policy is first normalized to a score within  $[0, 1]$  by the min and max values over the whole candidate policy set of all the algorithms. Let  $\pi_{\text{off}}^k$  denote the  $k$ -th ranked policy by the offline evaluation, then we use  $\frac{1}{K} \sum_{k=1}^K \pi_{\text{off}}^k$  and  $\max_k \{\pi_{\text{off}}^k\}$  as the mean and max top- $K$  score respectively. We report the scores with  $K \in \{1, 3, 5\}$ .

In addition, we report the average performance of the candidate policies as Policy Mean Score. Note that, it also represents the expectation of the top-1 score for a random selection method. All the metrics are shown from Table 7 to 18 for each domain and corresponding OPE method.

We also show additional correlation figures of each task on whole candidate policies below. The scatter plots compare the estimated values from OPEs against the ground truth values for every policy. The ground truth is estimated by the online performance, i.e.,  $v_{\text{gt}} = \frac{R_{\text{online}}}{(1-\gamma)h_{\max}}$ , where  $h_{\max}$  denotes the maximum horizon of the environment. Dots on the dashed line indicates the OPE methods perfectly predict the online performance. We found the FQE and WIS estimation can be far from the real online performance in most tasks. Especially, we can identify a vertical line on the left in most of the scatter plots of FQE, which indicates FQE fails to evaluate policies with very bad performance.

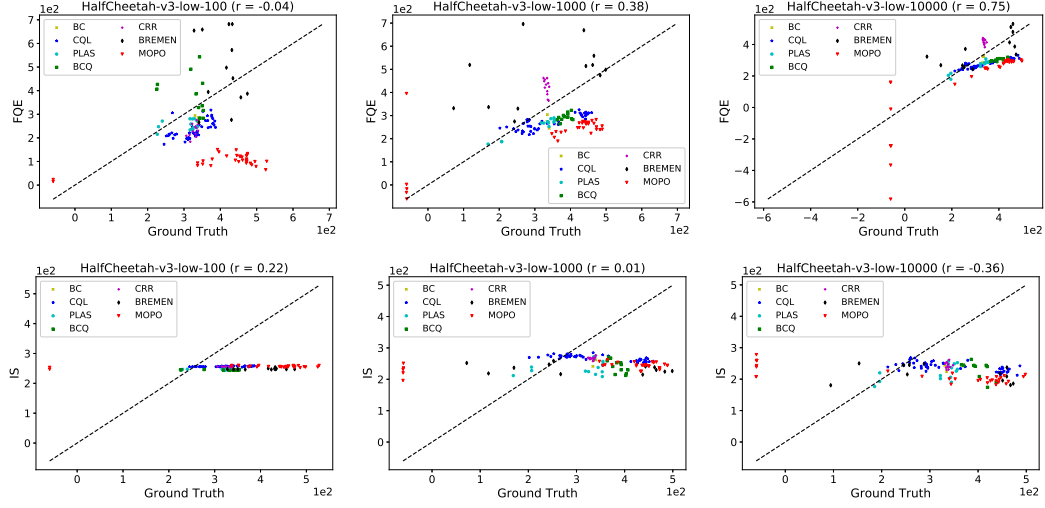

Figure 4: Scatter plot of OPE results for HalfCheetah-Low tasks.  $r$  stands for the correlation coefficient.

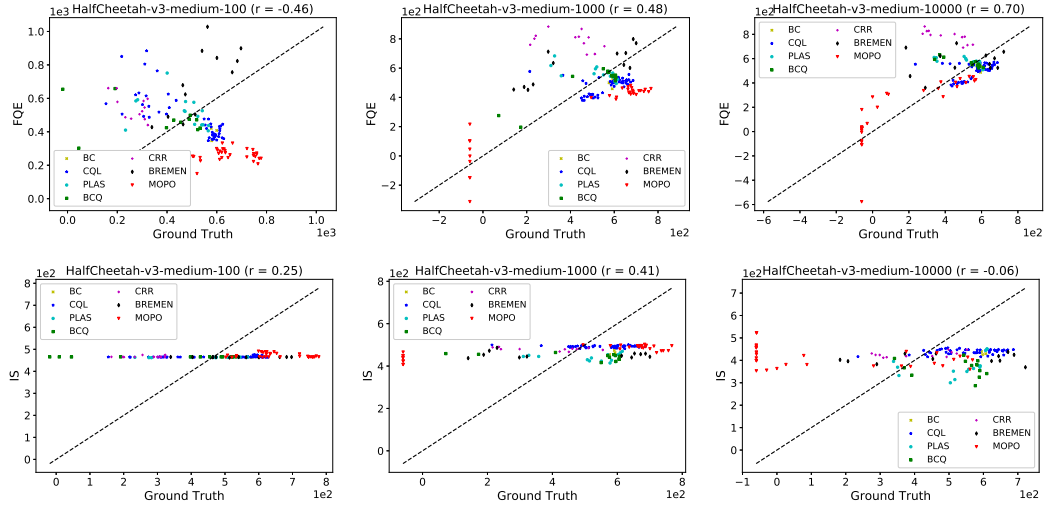

Figure 5: Scatter plot of OPE results for HalfCheetah-Medium tasks.  $r$  stands for the correlation coefficient.

Table 7: FQE performance on the policies from HalfCheetah tasks. L, M, H stands for low, medium and high quality of dataset.

| Task                  | RC Score         | Top-1 Mean Score | Top-3 Mean Score | Top-5 Mean Score | Top-1 Max Score | Top-3 Max Score | Top-5 Max Score | Policy Mean Score |
|-----------------------|------------------|------------------|------------------|------------------|-----------------|-----------------|-----------------|-------------------|
| HalfCheetah-L- $10^2$ | $-.122 \pm .007$ | $.834 \pm .007$  | $.787 \pm .000$  | $.771 \pm .000$  | $.834 \pm .007$ | $.839 \pm .000$ | $.839 \pm .000$ | 0.701             |
| HalfCheetah-L- $10^3$ | $.306 \pm .036$  | $.586 \pm .000$  | $.804 \pm .001$  | $.785 \pm .065$  | $.586 \pm .000$ | $.936 \pm .003$ | $.980 \pm .028$ | 0.724             |
| HalfCheetah-L- $10^4$ | $.631 \pm .052$  | $.621 \pm .439$  | $.697 \pm .275$  | $.730 \pm .124$  | $.621 \pm .439$ | $.932 \pm .000$ | $.932 \pm .000$ | 0.700             |
| HalfCheetah-M- $10^2$ | $-.636 \pm .009$ | $.730 \pm .000$  | $.741 \pm .041$  | $.724 \pm .085$  | $.730 \pm .000$ | $.884 \pm .021$ | $.899 \pm .000$ | 0.649             |
| HalfCheetah-M- $10^3$ | $.024 \pm .030$  | $.640 \pm .195$  | $.620 \pm .105$  | $.581 \pm .043$  | $.640 \pm .195$ | $.807 \pm .134$ | $.807 \pm .134$ | 0.683             |
| HalfCheetah-M- $10^4$ | $.382 \pm .016$  | $.449 \pm .007$  | $.481 \pm .030$  | $.499 \pm .017$  | $.449 \pm .007$ | $.537 \pm .083$ | $.622 \pm .046$ | 0.634             |
| HalfCheetah-H- $10^2$ | $-.295 \pm .021$ | $.518 \pm .190$  | $.418 \pm .079$  | $.459 \pm .065$  | $.518 \pm .190$ | $.653 \pm .001$ | $.738 \pm .059$ | 0.468             |
| HalfCheetah-H- $10^3$ | $-.207 \pm .028$ | $.760 \pm .103$  | $.441 \pm .146$  | $.429 \pm .145$  | $.760 \pm .103$ | $.795 \pm .089$ | $.795 \pm .089$ | 0.533             |
| HalfCheetah-H- $10^4$ | $.204 \pm .005$  | $.363 \pm .000$  | $.333 \pm .015$  | $.316 \pm .008$  | $.363 \pm .000$ | $.363 \pm .000$ | $.363 \pm .000$ | 0.467             |
| Average               | $.032 \pm .369$  | $.611 \pm .226$  | $.591 \pm .202$  | $.588 \pm .179$  | $.611 \pm .226$ | $.750 \pm .193$ | $.775 \pm .187$ | $.618 \pm .096$   |

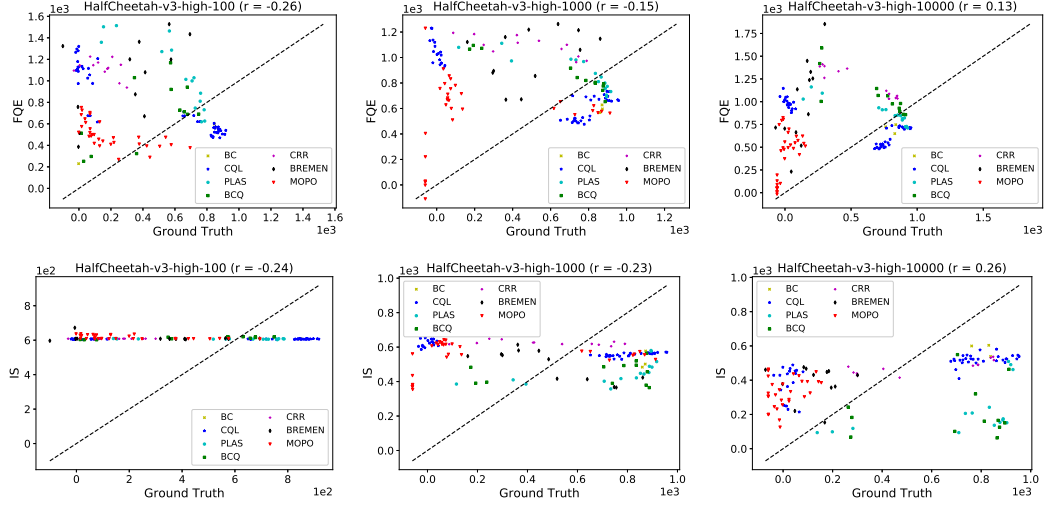

Figure 6: Scatter plot of OPE results for HalfCheetah-High tasks.  $r$  stands for the correlation coefficient.

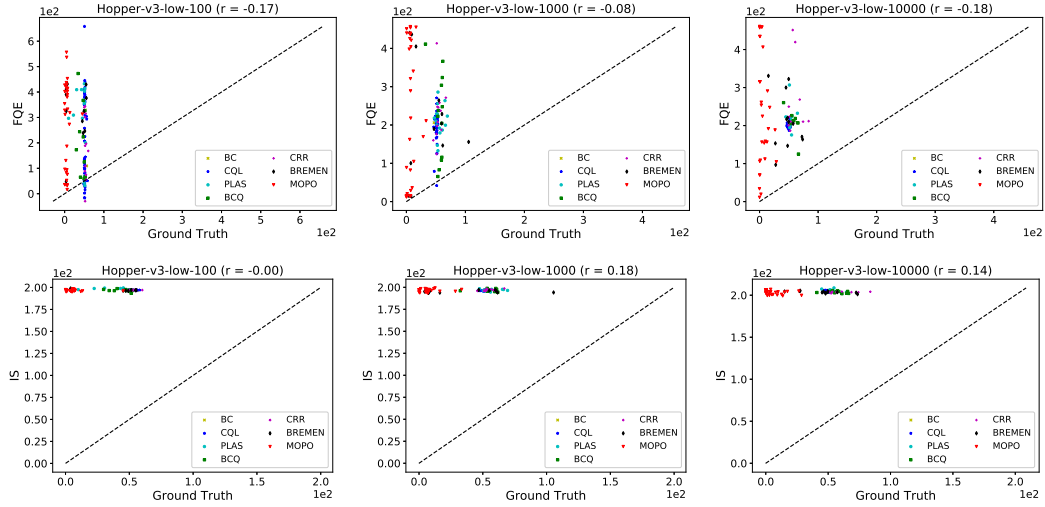

Figure 7: Scatter plot of OPE results for Hopper-Low tasks.  $r$  stands for the correlation coefficient.

Table 8: IS performance on the policies from HalfCheetah tasks. L, M, H stands for low, medium and high quality of dataset.

| Task                          | RC Score     | Top-1 Mean Score | Top-3 Mean Score | Top-5 Mean Score | Top-1 Max Score | Top-3 Max Score | Top-5 Max Score | Policy Mean Score |
|-------------------------------|--------------|------------------|------------------|------------------|-----------------|-----------------|-----------------|-------------------|
| HalfCheetah-L-10 <sup>2</sup> | .039 ± .242  | .689 ± .044      | .729 ± .053      | .732 ± .058      | .689 ± .044     | .855 ± .133     | .915 ± .062     | 0.701             |
| HalfCheetah-L-10 <sup>3</sup> | -.309 ± .034 | .658 ± .069      | .649 ± .052      | .642 ± .006      | .658 ± .069     | .718 ± .017     | .742 ± .000     | 0.724             |
| HalfCheetah-L-10 <sup>4</sup> | -.446 ± .015 | .457 ± .333      | .418 ± .045      | .511 ± .026      | .457 ± .333     | .654 ± .094     | .746 ± .067     | 0.700             |
| HalfCheetah-M-10 <sup>2</sup> | .215 ± .068  | .764 ± .100      | .653 ± .116      | .664 ± .104      | .764 ± .100     | .789 ± .083     | .802 ± .080     | 0.649             |
| HalfCheetah-M-10 <sup>3</sup> | .218 ± .099  | .540 ± .254      | .633 ± .126      | .642 ± .057      | .540 ± .254     | .829 ± .050     | .829 ± .050     | 0.683             |
| HalfCheetah-M-10 <sup>4</sup> | .108 ± .017  | .001 ± .000      | .001 ± .000      | .072 ± .100      | .001 ± .000     | .001 ± .000     | .184 ± .258     | 0.634             |
| HalfCheetah-H-10 <sup>2</sup> | .061 ± .184  | .147 ± .064      | .207 ± .087      | .205 ± .060      | .147 ± .064     | .351 ± .231     | .417 ± .176     | 0.468             |
| HalfCheetah-H-10 <sup>3</sup> | -.192 ± .103 | .105 ± .059      | .100 ± .020      | .125 ± .028      | .105 ± .059     | .191 ± .089     | .321 ± .118     | 0.533             |
| HalfCheetah-H-10 <sup>4</sup> | .346 ± .029  | .880 ± .000      | .870 ± .008      | .870 ± .023      | .880 ± .000     | .916 ± .025     | .948 ± .035     | 0.467             |
| Average                       | .004 ± .275  | .471 ± .333      | .473 ± .297      | .496 ± .279      | .471 ± .333     | .589 ± .326     | .656 ± .287     | .618 ± .096       |

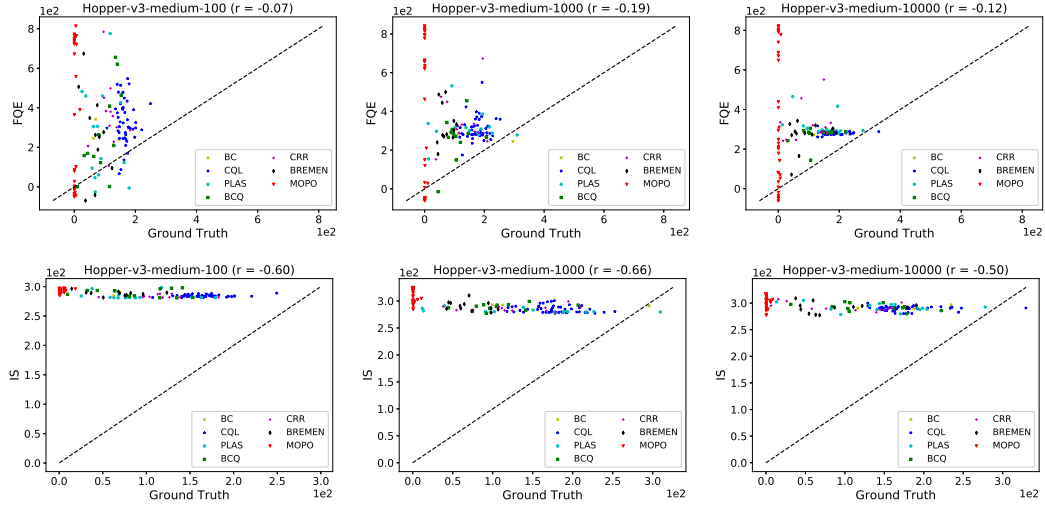

Figure 8: Scatter plot of OPE results for Hopper-Medium tasks.  $r$  stands for the correlation coefficient.

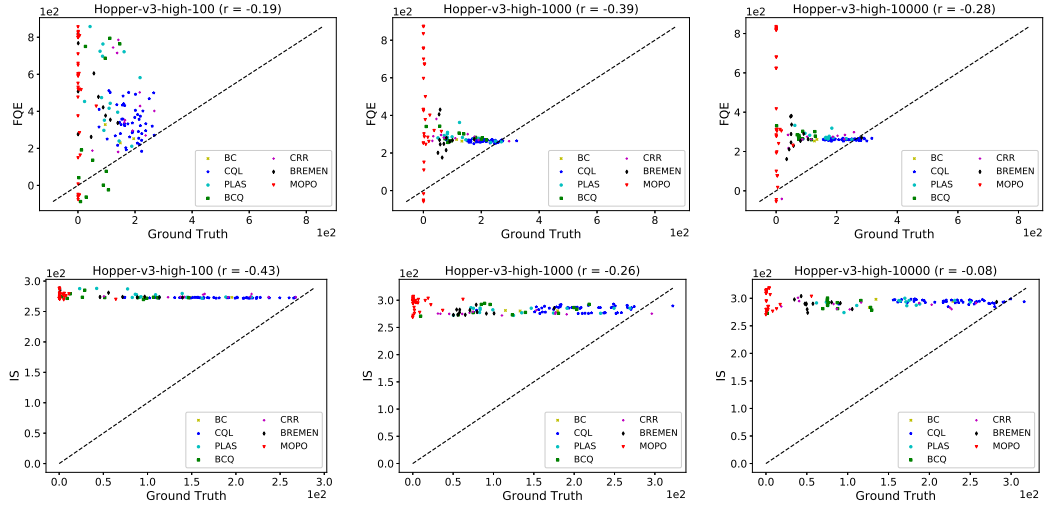

Figure 9: Scatter plot of OPE results for Hopper-High tasks.  $r$  stands for the correlation coefficient.

Table 9: FQE performance on the policies from Hopper tasks. L, M, H stands for low, medium and high quality of dataset.

| Task             | RC Score         | Top-1 Mean Score | Top-3 Mean Score | Top-5 Mean Score | Top-1 Max Score | Top-3 Max Score | Top-5 Max Score | Policy Mean Score |
|------------------|------------------|------------------|------------------|------------------|-----------------|-----------------|-----------------|-------------------|
| Hopper-L- $10^2$ | $-.101 \pm .059$ | $.586 \pm .359$  | $.416 \pm .141$  | $.377 \pm .029$  | $.586 \pm .359$ | $.830 \pm .015$ | $.844 \pm .005$ | 0.619             |
| Hopper-L- $10^3$ | $.085 \pm .071$  | $.022 \pm .029$  | $.057 \pm .029$  | $.053 \pm .011$  | $.022 \pm .029$ | $.104 \pm .038$ | $.112 \pm .031$ | 0.386             |
| Hopper-L- $10^4$ | $.223 \pm .152$  | $.260 \pm .331$  | $.267 \pm .211$  | $.189 \pm .130$  | $.260 \pm .331$ | $.551 \pm .361$ | $.551 \pm .361$ | 0.491             |
| Hopper-M- $10^2$ | $-.086 \pm .065$ | $.104 \pm .107$  | $.215 \pm .054$  | $.131 \pm .032$  | $.104 \pm .107$ | $.404 \pm .093$ | $.404 \pm .093$ | 0.383             |
| Hopper-M- $10^3$ | $-.005 \pm .177$ | $.001 \pm .001$  | $.002 \pm .000$  | $.002 \pm .000$  | $.001 \pm .001$ | $.002 \pm .001$ | $.002 \pm .000$ | 0.359             |
| Hopper-M- $10^4$ | $-.112 \pm .113$ | $.001 \pm .000$  | $.002 \pm .000$  | $.002 \pm .000$  | $.001 \pm .000$ | $.002 \pm .000$ | $.002 \pm .000$ | 0.344             |
| Hopper-H- $10^2$ | $-.246 \pm .060$ | $.054 \pm .074$  | $.020 \pm .024$  | $.012 \pm .015$  | $.054 \pm .074$ | $.055 \pm .073$ | $.055 \pm .073$ | 0.402             |
| Hopper-H- $10^3$ | $-.437 \pm .028$ | $.002 \pm .000$  | $.001 \pm .000$  | $.003 \pm .002$  | $.002 \pm .000$ | $.002 \pm .000$ | $.005 \pm .005$ | 0.387             |
| Hopper-H- $10^4$ | $-.201 \pm .063$ | $.001 \pm .001$  | $.008 \pm .009$  | $.005 \pm .006$  | $.001 \pm .001$ | $.021 \pm .027$ | $.021 \pm .027$ | 0.409             |
| Average          | $-.098 \pm .206$ | $.115 \pm .250$  | $.110 \pm .168$  | $.086 \pm .129$  | $.115 \pm .250$ | $.219 \pm .314$ | $.222 \pm .316$ | .420 $\pm$ .080   |



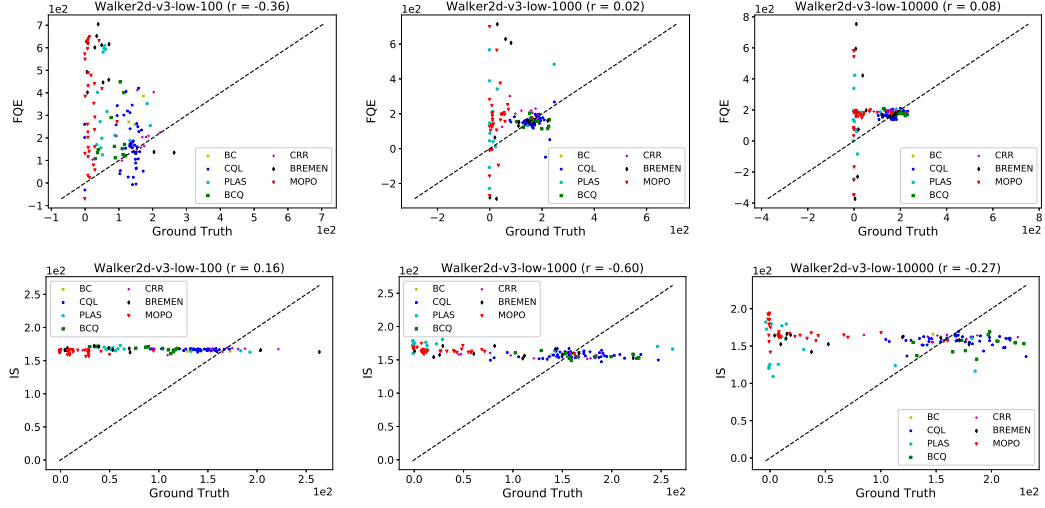

Figure 10: Scatter plot of OPE results for Walker2d-Low tasks.  $r$  stands for the correlation coefficient.

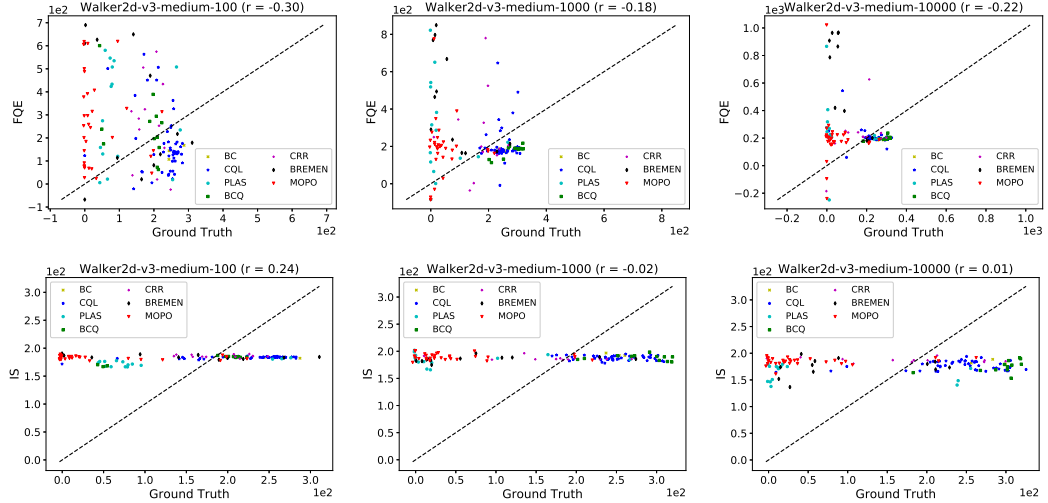

Figure 11: Scatter plot of OPE results for Walker2d-Medium tasks.  $r$  stands for the correlation coefficient.

Table 10: IS performance on the policies from Hopper tasks. L, M, H stands for low, medium and high quality of dataset.

| Task                     | RC Score     | Top-1 Mean Score | Top-3 Mean Score | Top-5 Mean Score | Top-1 Max Score | Top-3 Max Score | Top-5 Max Score | Policy Mean Score |
|--------------------------|--------------|------------------|------------------|------------------|-----------------|-----------------|-----------------|-------------------|
| Hopper-L-10 <sup>2</sup> | .098 ± .091  | .378 ± .304      | .375 ± .208      | .323 ± .142      | .378 ± .304     | .545 ± .157     | .626 ± .179     | 0.619             |
| Hopper-L-10 <sup>3</sup> | .161 ± .037  | .287 ± .236      | .406 ± .024      | .338 ± .037      | .287 ± .236     | .587 ± .023     | .609 ± .027     | 0.386             |
| Hopper-L-10 <sup>4</sup> | .138 ± .113  | .653 ± .000      | .558 ± .106      | .417 ± .120      | .653 ± .000     | .700 ± .066     | .700 ± .066     | 0.491             |
| Hopper-M-10 <sup>2</sup> | -.430 ± .158 | .338 ± .187      | .273 ± .084      | .263 ± .107      | .338 ± .187     | .436 ± .122     | .468 ± .138     | 0.383             |
| Hopper-M-10 <sup>3</sup> | -.620 ± .045 | .002 ± .000      | .001 ± .000      | .001 ± .000      | .002 ± .000     | .002 ± .000     | .002 ± .000     | 0.359             |
| Hopper-M-10 <sup>4</sup> | -.442 ± .030 | .000 ± .001      | .001 ± .000      | .005 ± .003      | .000 ± .001     | .002 ± .000     | .023 ± .016     | 0.344             |
| Hopper-H-10 <sup>2</sup> | -.439 ± .134 | .037 ± .050      | .036 ± .024      | .072 ± .017      | .037 ± .050     | .090 ± .065     | .219 ± .054     | 0.402             |
| Hopper-H-10 <sup>3</sup> | -.209 ± .051 | .002 ± .000      | .007 ± .006      | .008 ± .005      | .002 ± .000     | .010 ± .008     | .029 ± .023     | 0.387             |
| Hopper-H-10 <sup>4</sup> | -.016 ± .052 | .013 ± .000      | .013 ± .000      | .030 ± .031      | .013 ± .000     | .013 ± .000     | .074 ± .086     | 0.409             |
| Average                  | -.195 ± .296 | .190 ± .264      | .185 ± .222      | .162 ± .177      | .190 ± .264     | .265 ± .288     | .305 ± .289     | .420 ± .080       |

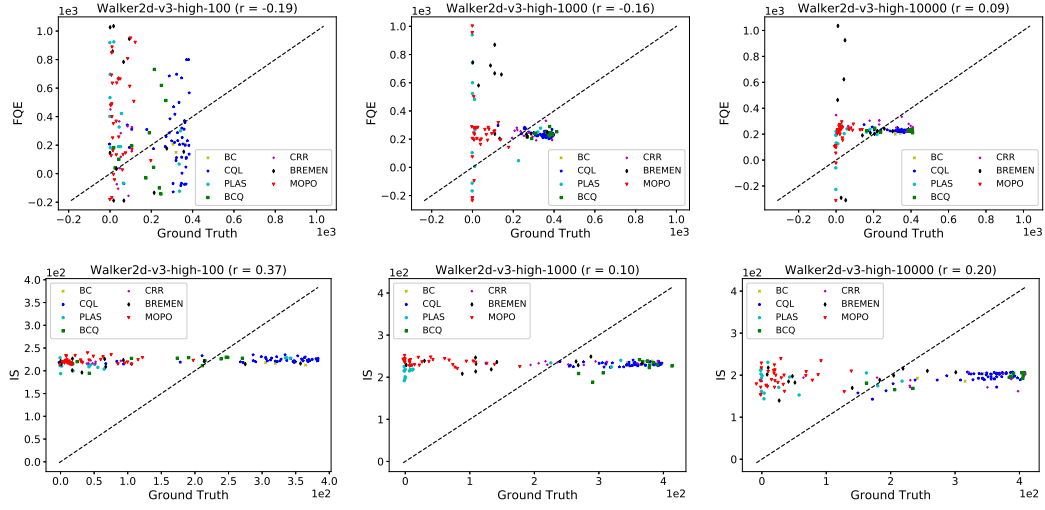

Figure 12: Scatter plot of OPE results for Walker2d-High tasks.  $r$  stands for the correlation coefficient.

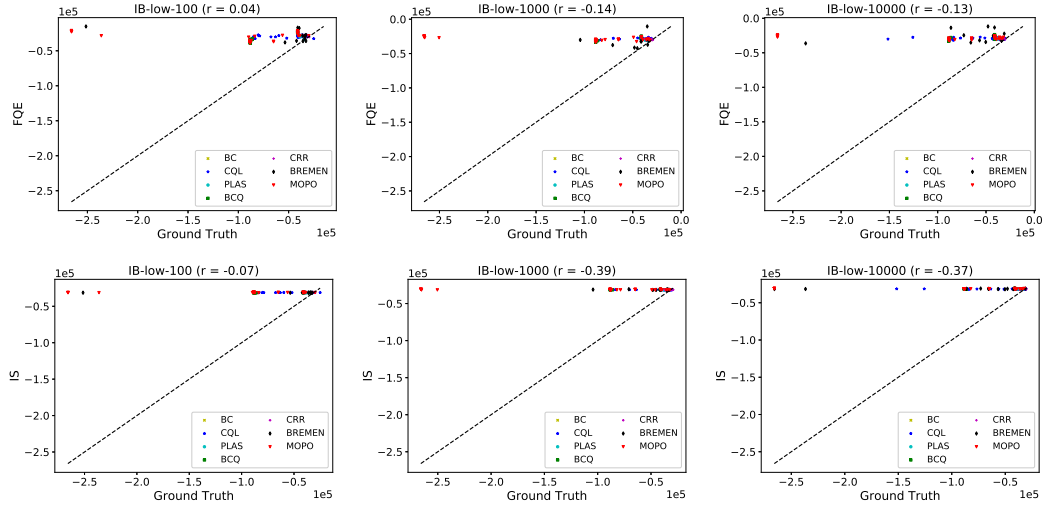

Figure 13: Scatter plot of OPE results for IB-Low tasks.  $r$  stands for the correlation coefficient.

Table 11: FQE performance on the policies from Walker2d tasks. L, M, H stands for low, medium and high quality of dataset.

| Task               | RC Score         | Top-1 Mean Score | Top-3 Mean Score | Top-5 Mean Score | Top-1 Max Score | Top-3 Max Score | Top-5 Max Score | Policy Mean Score |
|--------------------|------------------|------------------|------------------|------------------|-----------------|-----------------|-----------------|-------------------|
| Walker2d-L- $10^2$ | $-.287 \pm .020$ | $.072 \pm .057$  | $.127 \pm .013$  | $.126 \pm .013$  | $.072 \pm .057$ | $.182 \pm .023$ | $.212 \pm .045$ | 0.345             |
| Walker2d-L- $10^3$ | $.025 \pm .045$  | $.161 \pm .113$  | $.102 \pm .035$  | $.156 \pm .102$  | $.161 \pm .113$ | $.218 \pm .087$ | $.454 \pm .356$ | 0.418             |
| Walker2d-L- $10^4$ | $.267 \pm .136$  | $.035 \pm .018$  | $.036 \pm .008$  | $.040 \pm .007$  | $.035 \pm .018$ | $.063 \pm .014$ | $.073 \pm .011$ | 0.487             |
| Walker2d-M- $10^2$ | $-.220 \pm .037$ | $.262 \pm .183$  | $.239 \pm .115$  | $.245 \pm .088$  | $.262 \pm .183$ | $.461 \pm .124$ | $.535 \pm .063$ | 0.497             |
| Walker2d-M- $10^3$ | $-.036 \pm .044$ | $.044 \pm .027$  | $.133 \pm .140$  | $.215 \pm .146$  | $.044 \pm .027$ | $.292 \pm .325$ | $.562 \pm .213$ | 0.497             |
| Walker2d-M- $10^4$ | $-.101 \pm .130$ | $.107 \pm .073$  | $.155 \pm .043$  | $.143 \pm .030$  | $.107 \pm .073$ | $.249 \pm .043$ | $.249 \pm .043$ | 0.496             |
| Walker2d-H- $10^2$ | $-.306 \pm .124$ | $.051 \pm .000$  | $.093 \pm .054$  | $.129 \pm .039$  | $.051 \pm .000$ | $.188 \pm .097$ | $.275 \pm .035$ | 0.435             |
| Walker2d-H- $10^3$ | $-.171 \pm .052$ | $.031 \pm .034$  | $.052 \pm .049$  | $.106 \pm .035$  | $.031 \pm .034$ | $.145 \pm .147$ | $.322 \pm .037$ | 0.534             |
| Walker2d-H- $10^4$ | $.150 \pm .093$  | $.077 \pm .047$  | $.087 \pm .017$  | $.069 \pm .002$  | $.077 \pm .047$ | $.137 \pm .004$ | $.137 \pm .004$ | 0.516             |
| Average            | $-.075 \pm .205$ | $.093 \pm .108$  | $.114 \pm .089$  | $.136 \pm .092$  | $.093 \pm .108$ | $.215 \pm .172$ | $.313 \pm .215$ | $.469 \pm .056$   |

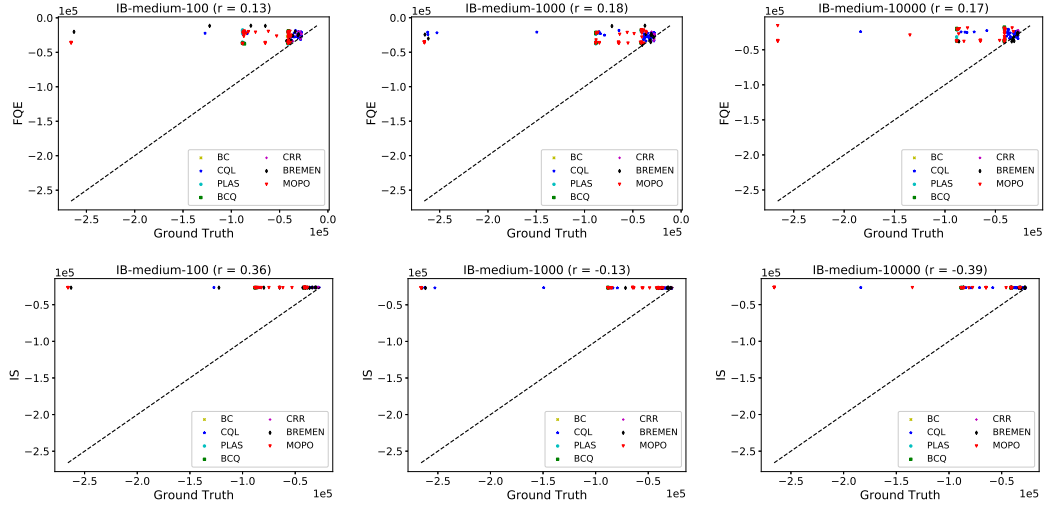

Figure 14: Scatter plot of OPE results for IB-Medium tasks.  $r$  stands for the correlation coefficient.

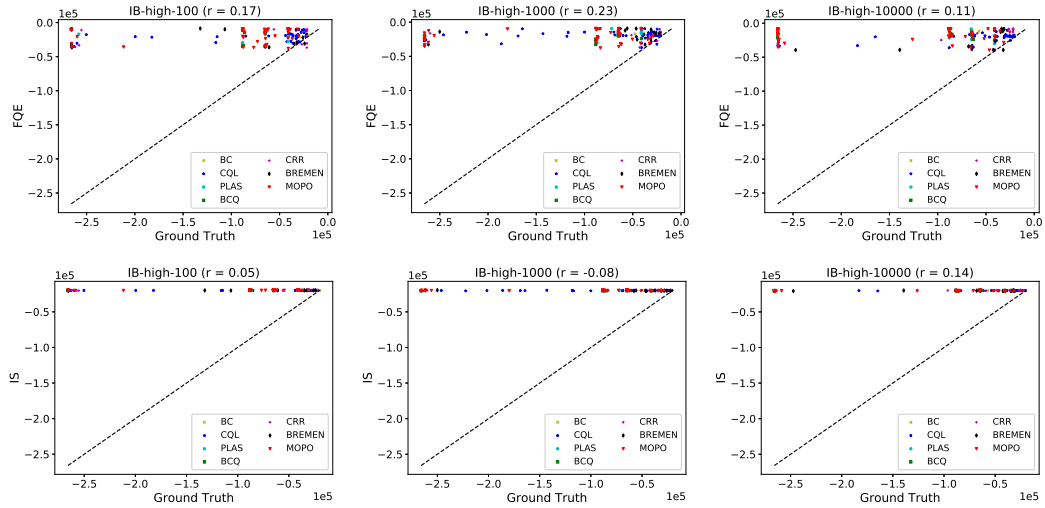

Figure 15: Scatter plot of OPE results for IB-High tasks.  $r$  stands for the correlation coefficient.

Table 12: IS performance on the policies from Walker2d tasks. L, M, H stands for low, medium and high quality of dataset.

| Task               | RC Score         | Top-1 Mean Score | Top-3 Mean Score | Top-5 Mean Score | Top-1 Max Score | Top-3 Max Score | Top-5 Max Score | Policy Mean Score |
|--------------------|------------------|------------------|------------------|------------------|-----------------|-----------------|-----------------|-------------------|
| Walker2d-L- $10^2$ | .064 $\pm$ .094  | .167 $\pm$ .051  | .164 $\pm$ .013  | .165 $\pm$ .006  | .167 $\pm$ .051 | .220 $\pm$ .021 | .246 $\pm$ .016 | 0.345             |
| Walker2d-L- $10^3$ | -.515 $\pm$ .051 | .094 $\pm$ .030  | .060 $\pm$ .019  | .041 $\pm$ .009  | .094 $\pm$ .030 | .115 $\pm$ .000 | .115 $\pm$ .000 | 0.418             |
| Walker2d-L- $10^4$ | -.326 $\pm$ .027 | .011 $\pm$ .002  | .018 $\pm$ .007  | .016 $\pm$ .004  | .011 $\pm$ .002 | .030 $\pm$ .023 | .030 $\pm$ .023 | 0.487             |
| Walker2d-M- $10^2$ | .161 $\pm$ .166  | .020 $\pm$ .018  | .256 $\pm$ .111  | .361 $\pm$ .092  | .020 $\pm$ .018 | .571 $\pm$ .186 | .734 $\pm$ .078 | 0.497             |
| Walker2d-M- $10^3$ | -.021 $\pm$ .038 | .009 $\pm$ .001  | .009 $\pm$ .000  | .072 $\pm$ .048  | .009 $\pm$ .001 | .010 $\pm$ .000 | .306 $\pm$ .245 | 0.497             |
| Walker2d-M- $10^4$ | -.036 $\pm$ .036 | .298 $\pm$ .229  | .450 $\pm$ .250  | .334 $\pm$ .134  | .298 $\pm$ .229 | .752 $\pm$ .161 | .790 $\pm$ .147 | 0.496             |
| Walker2d-H- $10^2$ | .441 $\pm$ .055  | .364 $\pm$ .297  | .519 $\pm$ .088  | .528 $\pm$ .099  | .364 $\pm$ .297 | .858 $\pm$ .058 | .878 $\pm$ .033 | 0.435             |
| Walker2d-H- $10^3$ | -.044 $\pm$ .065 | .093 $\pm$ .124  | .160 $\pm$ .078  | .221 $\pm$ .072  | .093 $\pm$ .124 | .436 $\pm$ .188 | .649 $\pm$ .235 | 0.534             |
| Walker2d-H- $10^4$ | .215 $\pm$ .070  | .117 $\pm$ .092  | .108 $\pm$ .041  | .101 $\pm$ .006  | .117 $\pm$ .092 | .191 $\pm$ .070 | .241 $\pm$ .000 | 0.516             |
| Average            | -.007 $\pm$ .279 | .130 $\pm$ .182  | .194 $\pm$ .199  | .204 $\pm$ .177  | .130 $\pm$ .182 | .354 $\pm$ .316 | .443 $\pm$ .326 | .469 $\pm$ .056   |

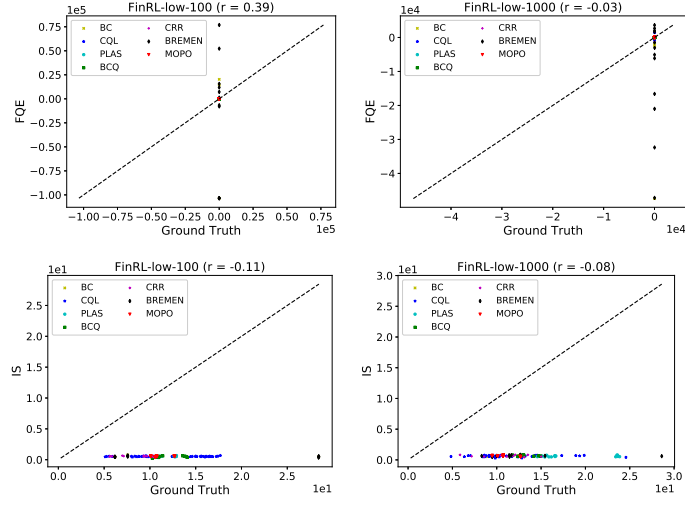

Figure 16: Scatter plot of OPE results for FinRL-Low tasks.  $r$  stands for the correlation coefficient.

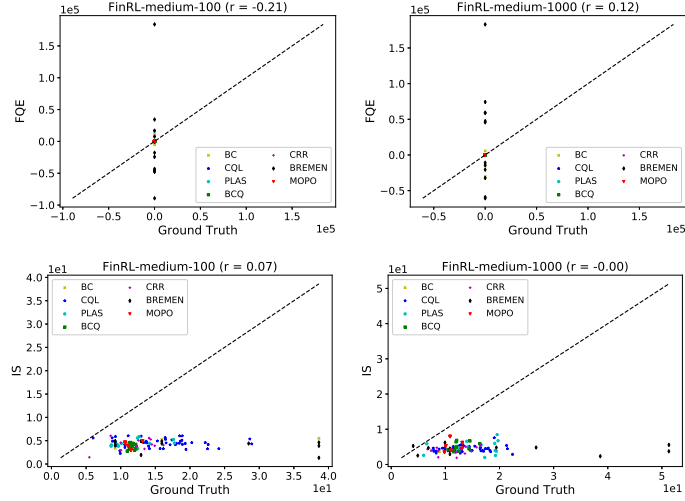

Figure 17: Scatter plot of OPE results for FinRL-Medium tasks.  $r$  stands for the correlation coefficient.

Table 13: FQE performance on the policies from IB tasks. L, M, H stands for low, medium and high quality of dataset.

| Task                 | RC Score     | Top-1 Mean Score | Top-3 Mean Score | Top-5 Mean Score | Top-1 Max Score | Top-3 Max Score | Top-5 Max Score | Policy Mean Score |
|----------------------|--------------|------------------|------------------|------------------|-----------------|-----------------|-----------------|-------------------|
| IB-L-10 <sup>2</sup> | .282 ± .027  | .060 ± .000      | .645 ± .000      | .511 ± .088      | .060 ± .000     | .940 ± .000     | .940 ± .000     | 0.847             |
| IB-L-10 <sup>3</sup> | -.013 ± .121 | .967 ± .012      | .322 ± .004      | .320 ± .088      | .967 ± .012     | .967 ± .012     | .967 ± .012     | 0.862             |
| IB-L-10 <sup>4</sup> | -.136 ± .091 | .935 ± .014      | .895 ± .020      | .802 ± .176      | .935 ± .014     | .968 ± .020     | .982 ± .020     | 0.850             |
| IB-M-10 <sup>2</sup> | .170 ± .047  | .781 ± .000      | .834 ± .067      | .828 ± .038      | .781 ± .000     | .922 ± .057     | .966 ± .012     | 0.873             |
| IB-M-10 <sup>3</sup> | .182 ± .009  | .863 ± .067      | .902 ± .002      | .919 ± .001      | .863 ± .067     | .948 ± .007     | .953 ± .007     | 0.842             |
| IB-M-10 <sup>4</sup> | .243 ± .015  | .000 ± .000      | .632 ± .005      | .756 ± .003      | .000 ± .000     | .953 ± .015     | .953 ± .015     | 0.881             |
| IB-H-10 <sup>2</sup> | .098 ± .015  | .452 ± .303      | .708 ± .106      | .640 ± .037      | .452 ± .303     | .914 ± .000     | .926 ± .017     | 0.715             |
| IB-H-10 <sup>3</sup> | .102 ± .034  | .879 ± .058      | .871 ± .031      | .855 ± .052      | .879 ± .058     | .911 ± .041     | .911 ± .042     | 0.732             |
| IB-H-10 <sup>4</sup> | .007 ± .025  | .889 ± .119      | .928 ± .034      | .858 ± .034      | .889 ± .119     | .982 ± .009     | .982 ± .009     | 0.694             |
| Average              | .104 ± .138  | .647 ± .377      | .749 ± .190      | .721 ± .200      | .647 ± .377     | .945 ± .035     | .953 ± .029     | .811 ± .070       |

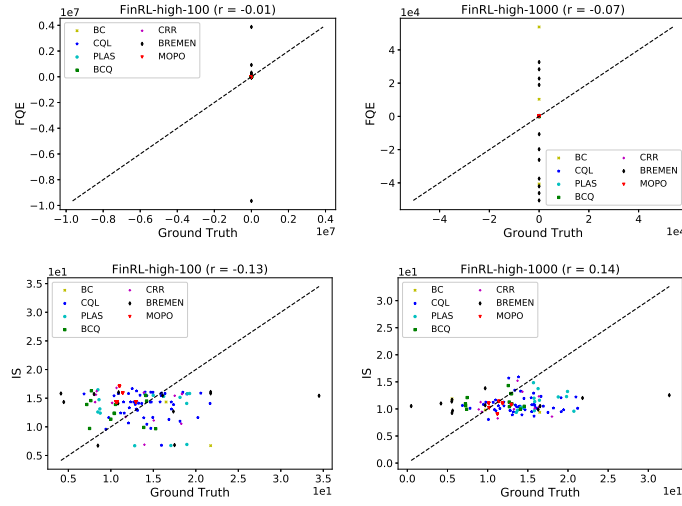

Figure 18: Scatter plot of OPE results for FinRL-High tasks.  $r$  stands for the correlation coefficient.

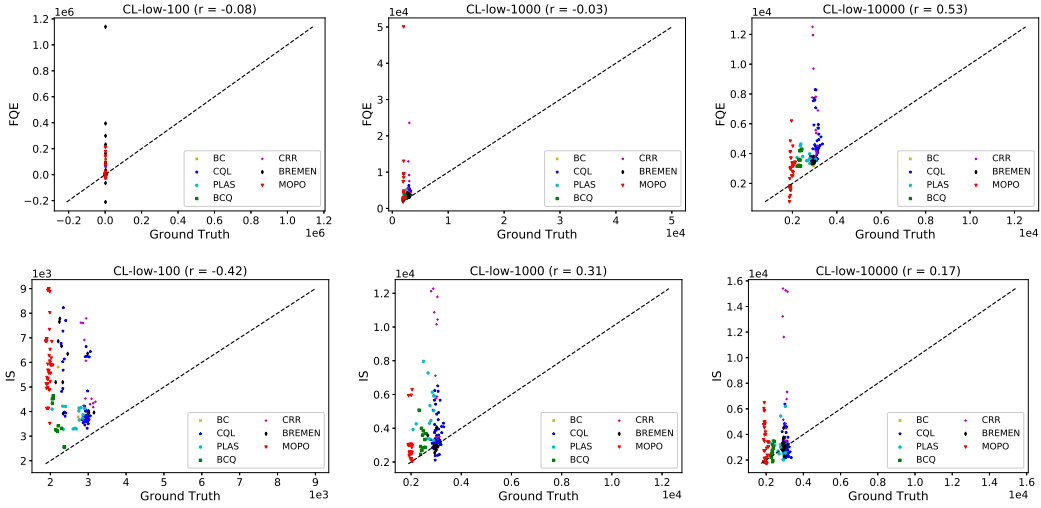

Figure 19: Scatter plot of OPE results for CL-Low tasks.  $r$  stands for the correlation coefficient.

Table 14: IS performance on the policies from IB tasks. L, M, H stands for low, medium and high quality of dataset.

| Task         | RC Score         | Top-1 Mean Score | Top-3 Mean Score | Top-5 Mean Score | Top-1 Max Score | Top-3 Max Score | Top-5 Max Score | Policy Mean Score |
|--------------|------------------|------------------|------------------|------------------|-----------------|-----------------|-----------------|-------------------|
| IB-L- $10^2$ | $-.375 \pm .129$ | $.867 \pm .091$  | $.837 \pm .045$  | $.843 \pm .048$  | $.867 \pm .091$ | $.932 \pm .002$ | $.934 \pm .005$ | 0.847             |
| IB-L- $10^3$ | $-.519 \pm .120$ | $.317 \pm .447$  | $.317 \pm .447$  | $.308 \pm .436$  | $.317 \pm .447$ | $.317 \pm .447$ | $.317 \pm .447$ | 0.862             |
| IB-L- $10^4$ | $-.375 \pm .016$ | $.980 \pm .018$  | $.861 \pm .150$  | $.771 \pm .270$  | $.980 \pm .018$ | $.993 \pm .000$ | $.993 \pm .000$ | 0.850             |
| IB-M- $10^2$ | $.195 \pm .294$  | $.962 \pm .025$  | $.963 \pm .015$  | $.908 \pm .103$  | $.962 \pm .025$ | $.980 \pm .026$ | $.995 \pm .005$ | 0.873             |
| IB-M- $10^3$ | $-.250 \pm .045$ | $.877 \pm .094$  | $.888 \pm .041$  | $.885 \pm .043$  | $.877 \pm .094$ | $.944 \pm .001$ | $.944 \pm .000$ | 0.842             |
| IB-M- $10^4$ | $-.341 \pm .036$ | $.251 \pm .355$  | $.571 \pm .005$  | $.722 \pm .002$  | $.251 \pm .355$ | $.960 \pm .014$ | $.972 \pm .008$ | 0.881             |
| IB-H- $10^2$ | $.053 \pm .099$  | $.820 \pm .004$  | $.789 \pm .122$  | $.861 \pm .067$  | $.820 \pm .004$ | $.993 \pm .000$ | $.993 \pm .000$ | 0.715             |
| IB-H- $10^3$ | $-.170 \pm .018$ | $.822 \pm .002$  | $.810 \pm .014$  | $.814 \pm .008$  | $.822 \pm .002$ | $.822 \pm .002$ | $.822 \pm .002$ | 0.732             |
| IB-H- $10^4$ | $.097 \pm .006$  | $.819 \pm .000$  | $.819 \pm .000$  | $.819 \pm .000$  | $.819 \pm .000$ | $.819 \pm .000$ | $.819 \pm .000$ | 0.694             |
| Average      | $-.187 \pm .263$ | $.746 \pm .320$  | $.762 \pm .248$  | $.770 \pm .247$  | $.746 \pm .320$ | $.862 \pm .252$ | $.866 \pm .253$ | $.811 \pm .070$   |

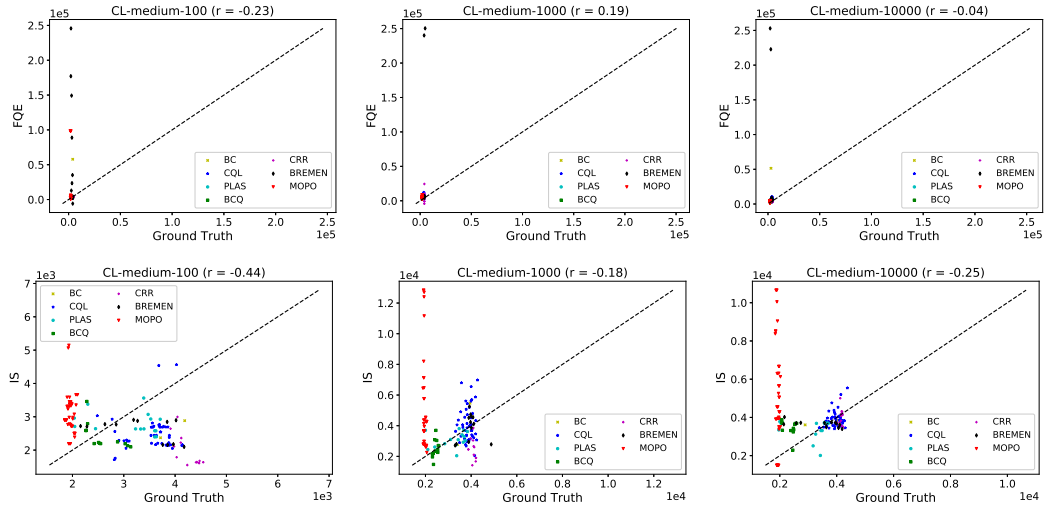

Figure 20: Scatter plot of OPE results for CL-Medium tasks.  $r$  stands for the correlation coefficient.

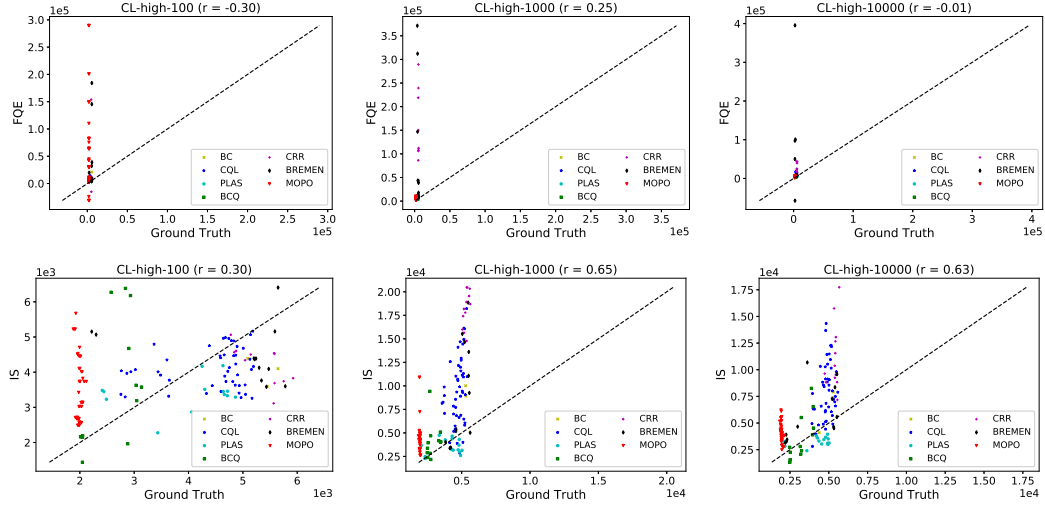

Figure 21: Scatter plot of OPE results for CL-High tasks.  $r$  stands for the correlation coefficient.

Table 15: FQE performance on the policies from FinRL tasks. L, M, H stands for low, medium and high quality of dataset.

| Task            | RC Score         | Top-1 Mean Score | Top-3 Mean Score | Top-5 Mean Score | Top-1 Max Score | Top-3 Max Score | Top-5 Max Score  | Policy Mean Score |
|-----------------|------------------|------------------|------------------|------------------|-----------------|-----------------|------------------|-------------------|
| FinRL-L- $10^2$ | $-.012 \pm .080$ | $.701 \pm .421$  | $.800 \pm .140$  | $.510 \pm .093$  | $.701 \pm .421$ | $.999 \pm .001$ | $.999 \pm .001$  | 0.285             |
| FinRL-L- $10^3$ | $-.015 \pm .030$ | $.209 \pm .010$  | $.266 \pm .040$  | $.353 \pm .063$  | $.209 \pm .010$ | $.349 \pm .071$ | $.685 \pm .232$  | 0.313             |
| FinRL-M- $10^2$ | $-.042 \pm .058$ | $.112 \pm .000$  | $.257 \pm .084$  | $.416 \pm .044$  | $.112 \pm .000$ | $.442 \pm .178$ | $1.000 \pm .000$ | 0.248             |
| FinRL-M- $10^3$ | $-.005 \pm .068$ | $.400 \pm .246$  | $.385 \pm .043$  | $.377 \pm .121$  | $.400 \pm .246$ | $.821 \pm .126$ | $.911 \pm .126$  | 0.195             |
| FinRL-H- $10^2$ | $-.056 \pm .121$ | $.165 \pm .042$  | $.108 \pm .012$  | $.192 \pm .029$  | $.165 \pm .042$ | $.196 \pm .037$ | $.484 \pm .068$  | 0.291             |
| FinRL-H- $10^3$ | $-.042 \pm .149$ | $.385 \pm .160$  | $.337 \pm .168$  | $.387 \pm .126$  | $.385 \pm .160$ | $.440 \pm .210$ | $.721 \pm .208$  | 0.384             |
| Average         | $-.029 \pm .095$ | $.329 \pm .289$  | $.359 \pm .237$  | $.372 \pm .129$  | $.329 \pm .289$ | $.541 \pm .306$ | $.800 \pm .234$  | $.286 \pm .058$   |

Table 16: IS performance on the policies from FinRL tasks. L, M, H stands for low, medium and high quality of dataset.

| Task                    | RC Score     | Top-1 Mean Score | Top-3 Mean Score | Top-5 Mean Score | Top-1 Max Score | Top-3 Max Score | Top-5 Max Score | Policy Mean Score |
|-------------------------|--------------|------------------|------------------|------------------|-----------------|-----------------|-----------------|-------------------|
| FinRL-L-10 <sup>2</sup> | .066 ± .109  | .267 ± .147      | .264 ± .022      | .247 ± .027      | .267 ± .147     | .489 ± .035     | .489 ± .035     | 0.285             |
| FinRL-L-10 <sup>3</sup> | -.041 ± .032 | .333 ± .047      | .361 ± .035      | .301 ± .018      | .333 ± .047     | .406 ± .029     | .406 ± .029     | 0.313             |
| FinRL-M-10 <sup>2</sup> | .103 ± .112  | .162 ± .051      | .263 ± .089      | .279 ± .090      | .162 ± .051     | .426 ± .210     | .428 ± .212     | 0.248             |
| FinRL-M-10 <sup>3</sup> | .056 ± .077  | .537 ± .328      | .297 ± .097      | .289 ± .080      | .537 ± .328     | .548 ± .319     | .687 ± .276     | 0.195             |
| FinRL-H-10 <sup>2</sup> | -.046 ± .065 | .283 ± .042      | .286 ± .067      | .304 ± .077      | .283 ± .042     | .348 ± .108     | .411 ± .144     | 0.291             |
| FinRL-H-10 <sup>3</sup> | .111 ± .027  | .458 ± .080      | .398 ± .007      | .404 ± .011      | .458 ± .080     | .458 ± .080     | .477 ± .074     | 0.384             |
| Average                 | .042 ± .100  | .340 ± .198      | .312 ± .081      | .304 ± .077      | .340 ± .198     | .446 ± .178     | .483 ± .185     | .286 ± .058       |

Table 17: FQE performance on the policies from CL tasks. L, M, H stands for low, medium and high quality of dataset.

| Task                 | RC Score     | Top-1 Mean Score | Top-3 Mean Score | Top-5 Mean Score | Top-1 Max Score | Top-3 Max Score | Top-5 Max Score | Policy Mean Score |
|----------------------|--------------|------------------|------------------|------------------|-----------------|-----------------|-----------------|-------------------|
| CL-L-10 <sup>2</sup> | .144 ± .056  | .270 ± .012      | .296 ± .028      | .294 ± .024      | .270 ± .012     | .358 ± .065     | .411 ± .047     | 0.443             |
| CL-L-10 <sup>3</sup> | .479 ± .013  | .511 ± .303      | .533 ± .163      | .476 ± .091      | .511 ± .303     | .807 ± .014     | .807 ± .014     | 0.504             |
| CL-L-10 <sup>4</sup> | .641 ± .048  | .710 ± .005      | .738 ± .019      | .750 ± .009      | .710 ± .005     | .798 ± .056     | .847 ± .027     | 0.494             |
| CL-M-10 <sup>2</sup> | .288 ± .250  | .231 ± .100      | .242 ± .058      | .183 ± .088      | .231 ± .100     | .396 ± .098     | .396 ± .098     | 0.414             |
| CL-M-10 <sup>3</sup> | .429 ± .038  | .780 ± .155      | .812 ± .004      | .725 ± .018      | .780 ± .155     | 1.000 ± .000    | 1.000 ± .000    | 0.405             |
| CL-M-10 <sup>4</sup> | .638 ± .031  | .220 ± .138      | .297 ± .002      | .440 ± .068      | .220 ± .138     | .414 ± .000     | .798 ± .076     | 0.486             |
| CL-H-10 <sup>2</sup> | -.116 ± .145 | .626 ± .422      | .508 ± .347      | .486 ± .345      | .626 ± .422     | .627 ± .420     | .645 ± .428     | 0.423             |
| CL-H-10 <sup>3</sup> | .584 ± .029  | .621 ± .082      | .697 ± .065      | .771 ± .044      | .621 ± .082     | .843 ± .088     | .907 ± .027     | 0.487             |
| CL-H-10 <sup>4</sup> | .618 ± .044  | .115 ± .006      | .221 ± .116      | .405 ± .065      | .115 ± .006     | .450 ± .352     | .979 ± .030     | 0.483             |
| Average              | .412 ± .267  | .454 ± .301      | .483 ± .256      | .503 ± .233      | .454 ± .301     | .633 ± .293     | .754 ± .260     | .460 ± .036       |

Table 18: IS performance on the policies from CL tasks. L, M, H stands for low, medium and high quality of dataset.

| Task                 | RC Score     | Top-1 Mean Score | Top-3 Mean Score | Top-5 Mean Score | Top-1 Max Score | Top-3 Max Score | Top-5 Max Score | Policy Mean Score |
|----------------------|--------------|------------------|------------------|------------------|-----------------|-----------------|-----------------|-------------------|
| CL-L-10 <sup>2</sup> | -.341 ± .128 | .079 ± .015      | .068 ± .011      | .072 ± .007      | .079 ± .015     | .083 ± .009     | .092 ± .006     | 0.443             |
| CL-L-10 <sup>3</sup> | .292 ± .081  | .563 ± .113      | .575 ± .158      | .653 ± .097      | .563 ± .113     | .705 ± .110     | .815 ± .013     | 0.504             |
| CL-L-10 <sup>4</sup> | .301 ± .108  | .757 ± .077      | .775 ± .010      | .767 ± .011      | .757 ± .077     | .866 ± .000     | .866 ± .000     | 0.494             |
| CL-M-10 <sup>2</sup> | -.284 ± .225 | .269 ± .172      | .199 ± .066      | .275 ± .073      | .269 ± .172     | .344 ± .075     | .503 ± .227     | 0.414             |
| CL-M-10 <sup>3</sup> | .079 ± .091  | .014 ± .004      | .014 ± .002      | .014 ± .001      | .014 ± .004     | .017 ± .000     | .017 ± .000     | 0.405             |
| CL-M-10 <sup>4</sup> | .108 ± .316  | .260 ± .341      | .289 ± .386      | .380 ± .326      | .260 ± .341     | .337 ± .448     | .592 ± .405     | 0.486             |
| CL-H-10 <sup>2</sup> | .217 ± .078  | .414 ± .366      | .331 ± .180      | .301 ± .153      | .414 ± .366     | .595 ± .316     | .679 ± .298     | 0.423             |
| CL-H-10 <sup>3</sup> | .615 ± .066  | .883 ± .035      | .914 ± .042      | .912 ± .037      | .883 ± .035     | .969 ± .029     | .969 ± .029     | 0.487             |
| CL-H-10 <sup>4</sup> | .678 ± .096  | .943 ± .055      | .872 ± .020      | .863 ± .019      | .943 ± .055     | .958 ± .035     | .958 ± .035     | 0.483             |
| Average              | .185 ± .362  | .465 ± .371      | .448 ± .360      | .471 ± .343      | .465 ± .371     | .542 ± .391     | .610 ± .380     | .460 ± .036       |

## F Additional Tables

In this section, we provide the winning rates table, raw and normalized scores that are not fitted in the main paper.

Table 19: Ratio of winning the 3 baselines over the 51 tasks by online evaluation.

| Baseline        | BCQ   | PLAS  | CQL   | CRR   | BREMEN | MOPO  |
|-----------------|-------|-------|-------|-------|--------|-------|
| Det. Policy     | 35.3% | 43.1% | 86.3% | 64.7% | 41.2%  | 13.7% |
| Behavior Policy | 41.2% | 52.9% | 92.2% | 74.5% | 49.0%  | 15.7% |
| BC              | 41.2% | 45.1% | 88.2% | 70.6% | 39.2%  | 15.7% |

Table 20: Ratio of winning the 3 baselines over the 51 tasks by FQE evaluation.

| Baseline        | BCQ   | PLAS  | CQL   | CRR   | BREMEN | MOPO  |
|-----------------|-------|-------|-------|-------|--------|-------|
| Det. Policy     | 15.7% | 11.8% | 31.4% | 39.2% | 23.5%  | 11.8% |
| Behavior Policy | 21.6% | 13.7% | 43.1% | 41.2% | 21.6%  | 7.8%  |
| BC              | 11.8% | 15.7% | 41.2% | 39.2% | 15.7%  | 7.8%  |

Table 21: Ratio of winning the 3 baselines over the 51 tasks by IS evaluation.

| Baseline        | BCQ   | PLAS  | CQL   | CRR   | BREMEN | MOPO  |
|-----------------|-------|-------|-------|-------|--------|-------|
| Det. Policy     | 23.5% | 29.4% | 39.2% | 49.0% | 19.6%  | 15.7% |
| Behavior Policy | 27.5% | 31.4% | 56.9% | 52.9% | 17.6%  | 13.7% |
| BC              | 25.5% | 27.5% | 39.2% | 47.1% | 19.6%  | 13.7% |

Table 22: Normalized score for HalfCheetah tasks. For each task, three lines indicate the results of online evaluation, FQE evaluation, WIS evaluation respectively. Bold numbers indicate the best result for each task, while numbers marked by \* indicate results worse than BC. The task name is composed of the specific task, the quality of dataset, and the number of trajectories. L, M, and H stands for low, medium, high respectively. Det. is abbreviation of deterministic.

| Task Name                     | Expert Policy | Det. Policy | Behavior Policy | Random | BC                | BCQ               | PLAS              | CQL               | CRR         | BREMEN            | MOPO              |
|-------------------------------|---------------|-------------|-----------------|--------|-------------------|-------------------|-------------------|-------------------|-------------|-------------------|-------------------|
| HalfCheetah-L-10 <sup>2</sup> | 100           | 27          | 25              | 0      | 29.1 + 0.3        | 30.2 + 0.3        | 28.8 + 0.4*       | 32.6 + 0.3        | 29.0 + 0.2* | 37.6 + 1.8        | <b>42.0 + 1.8</b> |
|                               |               |             |                 |        | 28.9 + 0.3        | 29.6 + 0.0        | 25.5 + 3.5*       | 31.5 + 0.8        | 29.0 + 0.0  | <b>36.5 + 0.3</b> | 36.3 + 1.9        |
|                               |               |             |                 |        | 29.4 + 0.0        | 26.6 + 1.6*       | 28.0 + 0.2*       | 30.2 + 1.6        | 28.0 + 0.7* | 34.3 + 3.4        | <b>35.3 + 4.3</b> |
| HalfCheetah-L-10 <sup>3</sup> | 100           | 27          | 25              | 0      | 29.1 + 0.2        | 34.1 + 0.4        | 30.6 + 0.0        | 38.2 + 0.5        | 29.2 + 0.2  | 39.6 + 1.8        | <b>40.1 + 0.9</b> |
|                               |               |             |                 |        | 29.0 + 0.0        | 34.4 + 0.0        | 30.5 + 0.0        | <b>36.6 + 0.7</b> | 28.6 + 0.6* | 23.6 + 0.0*       | 24.9 + 19.3*      |
|                               |               |             |                 |        | 29.1 + 0.2        | 31.7 + 0.2        | 29.3 + 0.0        | 27.3 + 3.5*       | 29.0 + 0.3* | 22.2 + 0.3*       | <b>33.5 + 2.0</b> |
| HalfCheetah-L-10 <sup>4</sup> | 100           | 27          | 25              | 0      | 28.9 + 0.1        | 36.7 + 0.7        | 30.6 + 0.2        | <b>39.8 + 1.4</b> | 29.3 + 0.5  | 39.1 + 0.3        | 37.7 + 0.3        |
|                               |               |             |                 |        | 29.0 + 0.0        | 35.7 + 1.1        | 30.1 + 0.5        | <b>39.0 + 1.2</b> | 28.9 + 0.2* | 38.9 + 0.0        | 24.0 + 18.7*      |
|                               |               |             |                 |        | 28.8 + 0.1        | <b>32.1 + 0.7</b> | 29.8 + 0.7        | 26.3 + 4.3*       | 29.2 + 0.3  | 19.4 + 3.4*       | -2.4 + 0.0*       |
| HalfCheetah-M-10 <sup>2</sup> | 100           | 50          | 46              | 0      | 48.9 + 0.8        | 43.2 + 1.5*       | 46.7 + 1.0*       | 51.6 + 0.4        | 27.2 + 0.6* | 52.3 + 5.0        | <b>63.1 + 0.5</b> |
|                               |               |             |                 |        | 48.3 + 0.0        | 12.0 + 7.9*       | 34.2 + 0.0*       | 24.8 + 3.6*       | 17.2 + 1.3* | 47.1 + 0.0*       | <b>52.1 + 0.4</b> |
|                               |               |             |                 |        | 49.5 + 0.7        | 42.9 + 1.2*       | 45.8 + 2.2*       | 40.2 + 11.4*      | 24.7 + 4.7* | 43.8 + 11.2*      | <b>51.9 + 1.3</b> |
| HalfCheetah-M-10 <sup>3</sup> | 100           | 50          | 46              | 0      | 49.0 + 0.6        | 50.6 + 0.1        | 50.8 + 0.4        | 54.6 + 0.3        | 43.2 + 2.6* | 55.4 + 3.0        | <b>62.3 + 1.1</b> |
|                               |               |             |                 |        | 49.5 + 0.0        | 42.4 + 5.3*       | 28.4 + 0.0*       | 19.4 + 0.0*       | 27.2 + 6.7* | <b>57.0 + 0.0</b> | 36.9 + 27.8*      |
|                               |               |             |                 |        | 48.9 + 0.5        | 45.1 + 7.2*       | 50.9 + 0.4        | 48.7 + 3.6*       | 21.2 + 0.2* | 34.8 + 15.1*      | <b>55.4 + 1.7</b> |
| HalfCheetah-M-10 <sup>4</sup> | 100           | 50          | 46              | 0      | 50.0 + 0.4        | 49.6 + 0.9*       | 50.8 + 0.2        | <b>55.8 + 0.9</b> | 44.0 + 1.7* | 55.8 + 3.2        | 43.7 + 0.9*       |
|                               |               |             |                 |        | 49.9 + 0.0        | 31.0 + 1.1*       | 33.7 + 6.2*       | <b>55.2 + 1.6</b> | 25.5 + 0.4* | 46.0 + 9.7*       | 45.2 + 0.8*       |
|                               |               |             |                 |        | 49.6 + 0.0        | 41.4 + 8.6*       | 50.9 + 0.0        | 44.1 + 3.2*       | 42.0 + 0.0* | <b>55.7 + 0.0</b> | -2.3 + 0.0*       |
| HalfCheetah-H-10 <sup>2</sup> | 100           | 74          | 64              | 0      | 47.2 + 31.8       | 57.6 + 3.1        | 64.2 + 0.7        | <b>74.0 + 1.5</b> | 24.0 + 1.6* | 29.0 + 22.7*      | 47.8 + 8.2        |
|                               |               |             |                 |        | <b>69.6 + 0.0</b> | 47.9 + 0.0*       | 16.4 + 3.3*       | 1.6 + 0.4*        | 8.9 + 7.8*  | 47.2 + 0.0*       | 4.2 + 0.8*        |
|                               |               |             |                 |        | <b>69.7 + 0.1</b> | 28.6 + 20.0*      | 43.9 + 21.5*      | 21.9 + 27.9*      | 16.4 + 5.6* | 26.5 + 18.7*      | 23.9 + 18.4*      |
| HalfCheetah-H-10 <sup>3</sup> | 100           | 74          | 64              | 0      | 71.3 + 0.5        | 72.4 + 0.3        | 74.1 + 0.8        | <b>77.4 + 1.3</b> | 62.5 + 1.9* | 54.8 + 17.1*      | 65.9 + 10.3*      |
|                               |               |             |                 |        | <b>71.7 + 0.1</b> | 17.7 + 0.0*       | 31.0 + 1.9*       | 0.2 + 0.1*        | 9.3 + 0.0*  | 59.0 + 8.3*       | 3.5 + 4.2*        |
|                               |               |             |                 |        | 71.7 + 0.0        | 67.2 + 3.4*       | <b>74.6 + 0.8</b> | 2.3 + 1.0*        | 28.0 + 5.8* | 29.4 + 2.5*       | 11.0 + 2.4*       |
| HalfCheetah-H-10 <sup>4</sup> | 100           | 74          | 64              | 0      | 66.7 + 2.7        | 73.3 + 1.4        | 75.4 + 0.6        | <b>77.2 + 0.9</b> | 69.6 + 0.4  | 15.7 + 2.8*       | 7.6 + 6.3*        |
|                               |               |             |                 |        | <b>69.0 + 0.0</b> | 24.5 + 0.0*       | 18.8 + 4.7*       | 1.3 + 0.0*        | 25.4 + 0.5* | 26.3 + 0.0*       | 1.2 + 0.0*        |
|                               |               |             |                 |        | 68.4 + 0.0        | 52.2 + 21.5*      | <b>74.7 + 0.0</b> | 70.1 + 3.5        | 69.5 + 0.4  | 11.7 + 3.3*       | -2.4 + 0.0*       |



Table 23: Normalized score for Hopper tasks. For each task, three lines indicate the results of online evaluation, FQE evaluation, WIS evaluation respectively. Bold numbers indicate the best result for each task, while numbers marked by \* indicate results worse than BC. The task name is composed of the specific task, the quality of dataset, and the number of trajectories. L, M, and H stands for low, medium, high respectively. Det. is abbreviation of deterministic.

| Task Name                | Expert Policy | Det. Policy | Behavior Policy | Random | BC                 | BCQ               | PLAS              | CQL                | CRR               | BREMEN            | MOPO        |
|--------------------------|---------------|-------------|-----------------|--------|--------------------|-------------------|-------------------|--------------------|-------------------|-------------------|-------------|
| Hopper-L-10 <sup>2</sup> | 100           | 15          | 15              | 0      | 16.1 + 0.6         | 15.3 + 0.3*       | 15.6 + 0.3*       | <b>16.5 + 0.5</b>  | 16.4 + 1.3        | 15.4 + 0.9*       | 5.0 + 6.1*  |
|                          |               |             |                 |        | <b>16.1 + 0.6</b>  | 11.1 + 2.2*       | 7.0 + 5.8*        | 15.0 + 0.3*        | 15.7 + 0.0*       | 10.7 + 6.3*       | 1.4 + 0.1*  |
|                          |               |             |                 |        | <b>16.1 + 0.6</b>  | 12.1 + 0.0*       | 9.8 + 2.9*        | 15.9 + 0.8*        | 16.0 + 0.2*       | 1.1 + 0.0*        | 1.0 + 0.7*  |
| Hopper-L-10 <sup>3</sup> | 100           | 15          | 15              | 0      | 15.1 + 0.7         | 18.1 + 0.2        | 19.3 + 1.6        | 16.0 + 0.1         | 16.8 + 0.6        | <b>21.4 + 7.6</b> | 6.2 + 3.1*  |
|                          |               |             |                 |        | 15.1 + 0.7         | 14.9 + 3.8*       | <b>18.2 + 1.6</b> | 15.4 + 0.2         | 17.1 + 2.2        | 2.1 + 0.4*        | 0.5 + 0.9*  |
|                          |               |             |                 |        | 14.6 + 0.6         | 17.4 + 1.0        | 16.1 + 2.6        | 15.6 + 0.4         | <b>17.5 + 1.9</b> | 1.3 + 0.2*        | 3.7 + 0.0*  |
| Hopper-L-10 <sup>4</sup> | 100           | 15          | 15              | 0      | 15.5 + 0.3         | 18.7 + 1.4        | 17.4 + 1.5        | 15.7 + 0.0         | <b>20.9 + 4.3</b> | 15.3 + 1.5*       | 7.4 + 2.3*  |
|                          |               |             |                 |        | 15.6 + 0.4         | 14.4 + 2.9*       | 15.0 + 1.1*       | 15.1 + 0.7*        | <b>17.5 + 0.6</b> | 10.4 + 8.4*       | 0.3 + 0.5*  |
|                          |               |             |                 |        | 15.7 + 0.3         | <b>17.3 + 1.9</b> | 16.5 + 0.0        | 14.2 + 0.1*        | 16.2 + 1.5        | 8.2 + 0.0*        | 0.6 + 0.6*  |
| Hopper-M-10 <sup>2</sup> | 100           | 46          | 42              | 0      | 28.0 + 11.4        | 40.9 + 1.5        | 50.0 + 3.4        | <b>63.2 + 9.4</b>  | 41.5 + 9.8        | 28.5 + 6.3        | 1.8 + 2.6*  |
|                          |               |             |                 |        | 28.7 + 10.9        | 21.0 + 15.6*      | 30.6 + 7.0        | <b>43.0 + 8.4</b>  | 29.8 + 1.1        | 6.3 + 4.2*        | 1.0 + 0.7*  |
|                          |               |             |                 |        | 36.4 + 10.9        | 29.1 + 14.2*      | 30.6 + 7.0*       | <b>69.8 + 8.2</b>  | 36.4 + 2.0        | 5.9 + 2.4*        | 2.3 + 2.3*  |
| Hopper-M-10 <sup>3</sup> | 100           | 46          | 42              | 0      | 51.3 + 27.2        | 47.7 + 11.1*      | 61.2 + 25.8       | <b>64.5 + 7.0</b>  | 47.8 + 10.5*      | 24.7 + 5.5*       | 1.0 + 1.5*  |
|                          |               |             |                 |        | <b>71.1 + 26.2</b> | 33.0 + 13.8*      | 32.3 + 6.8*       | 57.3 + 1.4*        | 38.8 + 15.1*      | 21.3 + 0.0*       | -0.1 + 0.1* |
|                          |               |             |                 |        | 30.2 + 0.0         | 33.3 + 7.7        | 28.0 + 29.0*      | <b>53.5 + 0.2</b>  | 42.1 + 11.9       | 21.3 + 0.0*       | -0.0 + 0.0* |
| Hopper-M-10 <sup>4</sup> | 100           | 46          | 42              | 0      | 54.4 + 14.8        | 56.6 + 7.8        | 62.9 + 17.0       | <b>81.6 + 13.1</b> | 49.1 + 2.2*       | 46.1 + 14.1*      | 1.1 + 0.9*  |
|                          |               |             |                 |        | <b>56.8 + 0.0</b>  | 29.8 + 3.2*       | 14.3 + 0.0*       | 43.7 + 6.5*        | 35.1 + 19.5*      | 15.0 + 2.8*       | -0.1 + 0.0* |
|                          |               |             |                 |        | <b>61.6 + 6.8</b>  | 30.9 + 0.9*       | 7.3 + 4.9*        | 40.8 + 2.5*        | 4.6 + 0.0*        | 16.6 + 3.9*       | -0.1 + 0.1* |
| Hopper-H-10 <sup>2</sup> | 100           | 69          | 47              | 0      | 44.4 + 12.4        | 35.7 + 6.5*       | 57.4 + 6.9        | <b>69.7 + 8.6</b>  | 65.6 + 12.8       | 28.5 + 11.6*      | 7.6 + 8.4*  |
|                          |               |             |                 |        | 39.0 + 14.3        | 13.3 + 14.5*      | 10.8 + 2.8*       | <b>44.1 + 15.1</b> | 42.4 + 0.6        | 0.0 + 0.0*        | -0.0 + 0.1* |
|                          |               |             |                 |        | 29.0 + 0.0         | 8.6 + 0.0*        | 14.3 + 6.8*       | <b>46.0 + 11.6</b> | 38.4 + 16.3       | 0.0 + 0.0*        | 0.5 + 0.8*  |
| Hopper-H-10 <sup>3</sup> | 100           | 69          | 47              | 0      | 43.1 + 8.3         | 51.3 + 10.2       | 76.0 + 4.5        | <b>76.6 + 1.3</b>  | 55.0 + 2.0        | 32.8 + 14.5*      | 11.5 + 5.8* |
|                          |               |             |                 |        | 43.1 + 8.3         | 24.8 + 21.9*      | 26.1 + 9.3*       | <b>51.9 + 23.2</b> | 13.8 + 3.7*       | 17.1 + 0.3*       | 0.0 + 0.0*  |
|                          |               |             |                 |        | 41.3 + 9.3         | 26.5 + 0.6*       | 24.1 + 1.6*       | <b>69.2 + 4.5</b>  | 26.4 + 15.0*      | 31.5 + 15.5*      | 0.0 + 0.0*  |
| Hopper-H-10 <sup>4</sup> | 100           | 69          | 47              | 0      | 49.5 + 14.1        | 28.1 + 5.3*       | 66.1 + 10.0       | <b>81.6 + 7.3</b>  | 62.4 + 5.0        | 47.3 + 27.3*      | 5.7 + 7.8*  |
|                          |               |             |                 |        | 50.3 + 13.5        | 13.2 + 18.1*      | 27.1 + 6.2*       | <b>74.3 + 17.3</b> | 29.7 + 34.1*      | 15.2 + 0.0*       | -0.0 + 0.1* |
|                          |               |             |                 |        | 50.3 + 13.5        | 22.8 + 0.0*       | 40.6 + 15.5*      | <b>87.6 + 4.6</b>  | 38.3 + 28.6*      | 12.9 + 0.0*       | 1.0 + 0.0*  |

Table 24: Normalized score for Walker2d tasks. For each task, three lines indicate the results of online evaluation, FQE evaluation, WIS evaluation respectively. Bold numbers indicate the best result for each task, while numbers marked by \* indicate results worse than BC. The task name is composed of the specific task, the quality of dataset, and the number of trajectories. L, M, and H stands for low, medium, high respectively. Det. is abbreviation of deterministic.

| Task Name                  | Expert Policy | Det. Policy | Behavior Policy | Random | BC                | BCQ               | PLAS              | CQL               | CRR               | BREMEN       | MOPO         |
|----------------------------|---------------|-------------|-----------------|--------|-------------------|-------------------|-------------------|-------------------|-------------------|--------------|--------------|
| Walker2d-L-10 <sup>2</sup> | 100           | 30          | 24              | 0      | 29.1 + 3.5        | 22.2 + 0.3*       | 33.0 + 5.1        | 30.3 + 1.0        | <b>36.4 + 4.8</b> | 21.8 + 20.8* | 9.7 + 9.1*   |
|                            |               |             |                 |        | <b>29.1 + 3.5</b> | 20.6 + 0.5*       | 10.7 + 0.5*       | 16.3 + 12.8*      | 27.1 + 4.2*       | 3.4 + 2.9*   | 4.5 + 3.7*   |
|                            |               |             |                 |        | <b>28.6 + 0.0</b> | 7.4 + 0.2*        | 10.5 + 2.5*       | 8.4 + 12.2*       | 28.3 + 7.3*       | 7.2 + 1.7*   | 3.8 + 1.5*   |
| Walker2d-L-10 <sup>3</sup> | 100           | 30          | 24              | 0      | 28.5 + 1.9        | 38.0 + 4.5        | 42.1 + 10.3       | <b>44.7 + 2.7</b> | 34.1 + 1.8        | 32.4 + 8.7   | 11.6 + 14.1* |
|                            |               |             |                 |        | 27.1 + 0.1        | 26.8 + 4.9*       | 16.6 + 22.1*      | <b>45.8 + 1.6</b> | 19.4 + 10.6*      | 8.8 + 5.0*   | 0.7 + 1.2*   |
|                            |               |             |                 |        | 29.9 + 1.9        | 29.3 + 9.9*       | 4.5 + 1.6*        | <b>31.6 + 1.3</b> | 6.3 + 6.1*        | 12.4 + 4.8*  | 0.9 + 0.7*   |
| Walker2d-L-10 <sup>4</sup> | 100           | 30          | 24              | 0      | 31.9 + 2.4        | 39.1 + 3.6        | 31.1 + 6.5*       | <b>40.2 + 1.4</b> | 33.2 + 7.3        | 29.4 + 4.8*  | 11.5 + 13.9* |
|                            |               |             |                 |        | 32.7 + 0.0        | 29.6 + 6.3*       | 0.1 + 0.6*        | <b>39.0 + 0.0</b> | 29.7 + 1.0*       | 1.4 + 0.4*   | -0.2 + 0.0*  |
|                            |               |             |                 |        | 30.0 + 1.9        | <b>38.6 + 0.0</b> | 1.4 + 1.6*        | 33.1 + 0.0        | 30.3 + 11.1       | 2.4 + 1.2*   | -0.3 + 0.1*  |
| Walker2d-M-10 <sup>2</sup> | 100           | 49          | 43              | 0      | 50.2 + 4.0        | 42.0 + 1.0*       | 51.6 + 1.7        | <b>53.2 + 2.5</b> | 39.5 + 4.8*       | 37.6 + 26.5* | 20.1 + 15.5* |
|                            |               |             |                 |        | <b>50.2 + 4.0</b> | 8.7 + 0.6*        | 26.2 + 18.1*      | 37.2 + 9.3*       | 36.1 + 7.0*       | 15.3 + 11.2* | 8.9 + 7.1*   |
|                            |               |             |                 |        | 47.4 + 0.1        | 39.4 + 2.9*       | <b>53.7 + 0.0</b> | 47.9 + 3.1        | 33.5 + 7.6*       | 14.1 + 20.1* | 0.5 + 1.2*   |
| Walker2d-M-10 <sup>3</sup> | 100           | 49          | 43              | 0      | 48.7 + 1.9        | <b>61.7 + 0.5</b> | 34.6 + 13.2*      | 57.3 + 1.0        | 44.7 + 6.9*       | 37.5 + 16.6* | 39.9 + 2.0*  |
|                            |               |             |                 |        | <b>47.6 + 2.1</b> | 47.3 + 10.4*      | -0.3 + 0.0*       | 45.8 + 0.6*       | 34.2 + 3.7*       | 3.0 + 0.4*   | 12.2 + 7.1*  |
|                            |               |             |                 |        | 48.7 + 1.9        | <b>52.7 + 9.8</b> | -0.2 + 0.1*       | 48.6 + 7.8*       | 10.1 + 11.4*      | 24.6 + 14.1* | -0.1 + 0.0*  |
| Walker2d-M-10 <sup>4</sup> | 100           | 49          | 43              | 0      | 54.4 + 3.5        | <b>60.2 + 1.4</b> | 47.5 + 1.5*       | 58.6 + 1.2        | 54.8 + 2.5*       | 41.5 + 2.5*  | 31.9 + 20.3* |
|                            |               |             |                 |        | <b>56.1 + 1.5</b> | 51.6 + 11.3*      | 0.2 + 0.3*        | 10.8 + 6.4*       | 38.6 + 2.6*       | 10.0 + 1.3*  | 5.4 + 7.7*   |
|                            |               |             |                 |        | 55.1 + 0.0        | <b>58.6 + 4.6</b> | 1.0 + 1.7*        | 46.9 + 3.9*       | 39.8 + 1.1*       | 19.0 + 15.5* | 18.4 + 23.1* |
| Walker2d-H-10 <sup>2</sup> | 100           | 69          | 57              | 0      | 64.1 + 4.9        | 47.6 + 4.5*       | 65.6 + 0.6        | <b>74.3 + 0.3</b> | 14.8 + 6.1*       | 24.3 + 31.9* | 23.2 + 3.6*  |
|                            |               |             |                 |        | 67.0 + 5.4        | 19.5 + 15.8*      | 4.7 + 4.5*        | <b>73.4 + 1.1</b> | 11.6 + 4.2*       | 3.4 + 0.0*   | 14.8 + 9.7*  |
|                            |               |             |                 |        | 61.2 + 1.3        | 38.3 + 12.6*      | <b>65.8 + 0.5</b> | 59.6 + 3.9*       | 12.1 + 3.8*       | 6.5 + 4.4*   | 11.6 + 2.8*  |
| Walker2d-H-10 <sup>3</sup> | 100           | 69          | 57              | 0      | 72.6 + 4.2        | <b>76.6 + 2.8</b> | 57.0 + 9.4*       | 75.3 + 1.9        | 67.1 + 9.6*       | 48.0 + 20.6* | 18.0 + 3.0*  |
|                            |               |             |                 |        | <b>74.4 + 0.0</b> | 69.7 + 7.2*       | -0.3 + 0.0*       | 33.1 + 12.4*      | 57.9 + 11.3*      | 18.2 + 9.2*  | -0.2 + 0.0*  |
|                            |               |             |                 |        | 71.9 + 3.5        | <b>72.8 + 1.7</b> | 21.4 + 30.8*      | 60.9 + 10.1*      | 62.0 + 11.0*      | 32.7 + 16.4* | -0.2 + 0.0*  |
| Walker2d-H-10 <sup>4</sup> | 100           | 69          | 57              | 0      | 58.3 + 8.4        | <b>77.9 + 1.4</b> | 36.3 + 4.5*       | 74.9 + 0.8        | 71.7 + 7.0        | 48.0 + 9.5*  | 17.7 + 0.8*  |
|                            |               |             |                 |        | <b>60.1 + 9.3</b> | 51.6 + 16.3*      | 1.5 + 2.5*        | 43.1 + 20.0*      | 14.9 + 21.2*      | 4.6 + 3.8*   | 1.3 + 3.3*   |
|                            |               |             |                 |        | 66.7 + 0.0        | <b>79.3 + 0.1</b> | 1.8 + 0.0*        | 74.0 + 1.3        | 73.8 + 8.0        | 1.9 + 0.0*   | 7.8 + 7.5*   |

Table 25: Normalized score for IB tasks. For each task, three lines indicate the results of online evaluation, FQE evaluation, WIS evaluation respectively. Bold numbers indicate the best result for each task, while numbers marked by \* indicate results worse than BC. The task name is composed of the specific task, the quality of dataset, and the number of trajectories. L, M, and H stands for low, medium, high respectively. Det. is abbreviation of deterministic.

| Task Name            | Expert Policy | Det. Policy | Behavior Policy | Random | BC                 | BCQ             | PLAS            | CQL               | CRR                 | BREMEN           | MOPO             |
|----------------------|---------------|-------------|-----------------|--------|--------------------|-----------------|-----------------|-------------------|---------------------|------------------|------------------|
| IB-L-10 <sup>2</sup> | 100           | -19         | -19             | 0      | -19.8 + 1.6        | -287.5 + 155.5* | -34.9 + 23.6*   | <b>2.5 + 3.2</b>  | -5.3 + 14.4         | -34.5 + 24.7*    | -181.0 + 162.7*  |
|                      |               |             |                 |        | -19.2 + 1.8        | -68.0 + 0.0*    | -68.0 + 0.0*    | -65.2 + 0.0*      | <b>-17.9 + 3.9</b>  | -1598.8 + 0.0*   | -1703.9 + 0.5*   |
|                      |               |             |                 |        | <b>-19.2 + 1.8</b> | -411.2 + 0.1*   | -182.8 + 162.5* | -150.2 + 160.9*   | -153.6 + 181.3*     | -97.0 + 44.6*    | -240.8 + 140.2*  |
| IB-L-10 <sup>3</sup> | 100           | -19         | -19             | 0      | -16.2 + 2.7        | -177.2 + 155.1* | -30.5 + 26.6*   | <b>-0.4 + 4.5</b> | -5.3 + 17.1         | -37.3 + 21.6*    | -163.4 + 177.7*  |
|                      |               |             |                 |        | <b>-14.4 + 0.2</b> | -68.0 + 0.3*    | -68.1 + 0.0*    | -53.8 + 27.7*     | -21.7 + 10.2*       | -19.3 + 6.2*     | -1704.1 + 0.3*   |
|                      |               |             |                 |        | -20.0 + 0.0        | -68.2 + 0.3*    | -68.1 + 0.0*    | -179.0 + 139.9*   | <b>-14.6 + 18.2</b> | -283.9 + 0.0*    | -1158.9 + 771.6* |
| IB-L-10 <sup>4</sup> | 100           | -19         | -19             | 0      | -18.6 + 3.0        | -177.6 + 155.4* | -146.5 + 187.9* | -6.2 + 13.9       | <b>-1.5 + 11.9</b>  | -122.6 + 46.3*   | -171.7 + 171.1*  |
|                      |               |             |                 |        | <b>-22.6 + 0.0</b> | -68.2 + 0.1*    | -68.1 + 0.2*    | -135.4 + 99.5*    | -47.9 + 21.6*       | -101.3 + 23.2*   | -1158.4 + 771.2* |
|                      |               |             |                 |        | -17.9 + 3.3        | -67.9 + 0.2*    | -182.5 + 162.4* | <b>3.7 + 2.8</b>  | -17.4 + 0.0         | -68.6 + 0.0*     | -2.0 + 0.0       |
| IB-M-10 <sup>2</sup> | 100           | 25          | 25              | 0      | -9.2 + 46.9        | -177.7 + 155.2* | -291.7 + 160.4* | 24.4 + 4.9        | <b>25.6 + 3.8</b>   | -97.8 + 104.1*   | -59.8 + 5.7*     |
|                      |               |             |                 |        | 18.2 + 0.0         | -67.9 + 0.1*    | -182.6 + 162.0* | -27.9 + 21.5*     | <b>21.1 + 0.0</b>   | -349.4 + 0.0*    | -224.6 + 140.9*  |
|                      |               |             |                 |        | <b>25.7 + 5.3</b>  | -182.6 + 162.2* | -297.8 + 162.5* | -125.6 + 187.0*   | -3.1 + 41.7*        | -214.7 + 314.9*  | -612.6 + 771.3*  |
| IB-M-10 <sup>3</sup> | 100           | 25          | 25              | 0      | 27.1 + 0.4         | -181.6 + 161.0* | -182.7 + 161.9* | 25.2 + 1.6*       | <b>28.9 + 2.9</b>   | -16.0 + 32.6*    | -119.2 + 85.7*   |
|                      |               |             |                 |        | <b>26.6 + 0.0</b>  | -67.7 + 0.2*    | -67.6 + 0.0*    | -237.2 + 0.0*     | 8.7 + 0.0*          | -207.3 + 117.1*  | -67.3 + 0.0*     |
|                      |               |             |                 |        | <b>27.3 + 0.2</b>  | -297.3 + 162.1* | -412.0 + 0.3*   | -1679.1 + 0.0*    | 27.2 + 1.2*         | 4.1 + 1.5*       | -123.1 + 80.2*   |
| IB-M-10 <sup>4</sup> | 100           | 25          | 25              | 0      | 27.7 + 2.7         | -181.5 + 163.1* | -182.6 + 162.3* | 26.9 + 6.4*       | <b>30.4 + 0.4</b>   | 1.6 + 18.4*      | -48.8 + 26.2*    |
|                      |               |             |                 |        | 29.4 + 0.7         | -67.8 + 0.1*    | -67.7 + 0.0*    | -56.1 + 13.0*     | <b>31.3 + 0.0</b>   | 27.8 + 0.3*      | -1704.2 + 0.0*   |
|                      |               |             |                 |        | 27.3 + 2.3         | -67.7 + 0.3*    | -67.7 + 0.0*    | -14.8 + 32.2*     | <b>28.5 + 2.8</b>   | -395.9 + 0.0*    | -1704.2 + 0.0*   |
| IB-H-10 <sup>2</sup> | 100           | 70          | 70              | 0      | 57.8 + 30.5        | -288.6 + 77.0*  | -178.5 + 78.5*  | 32.9 + 27.0*      | <b>73.2 + 0.1</b>   | -89.1 + 108.5*   | -77.0 + 70.0*    |
|                      |               |             |                 |        | <b>72.0 + 0.0</b>  | -842.3 + 609.1* | -183.1 + 162.3* | -140.5 + 192.0*   | -493.7 + 801.7*     | -1055.0 + 457.8* | -269.4 + 146.2*  |
|                      |               |             |                 |        | 62.4 + 33.2        | -241.3 + 0.2*   | -594.5 + 744.6* | -25.1 + 67.9*     | <b>72.8 + 0.1</b>   | -811.5 + 695.3*  | -116.1 + 77.7*   |
| IB-H-10 <sup>3</sup> | 100           | 70          | 70              | 0      | 9.4 + 88.0         | -297.9 + 80.7*  | -171.4 + 146.4* | 15.5 + 48.9       | <b>69.7 + 0.1</b>   | -31.5 + 113.4*   | -97.5 + 89.6*    |
|                      |               |             |                 |        | -31.6 + 77.9       | -398.4 + 0.0*   | -68.1 + 0.2*    | -165.7 + 86.4*    | <b>69.6 + 0.0</b>   | -114.8 + 85.0*   | -158.6 + 114.9*  |
|                      |               |             |                 |        | -94.1 + 29.7       | -241.5 + 0.0*   | -297.7 + 80.3*  | -575.7 + 331.5*   | <b>72.2 + 0.5</b>   | -1145.9 + 687.5* | -239.1 + 3.2*    |
| IB-H-10 <sup>4</sup> | 100           | 70          | 70              | 0      | -34.2 + 111.3      | -183.1 + 81.4*  | -184.7 + 82.1*  | 34.2 + 34.1       | <b>61.7 + 15.6</b>  | -5.6 + 11.5      | -127.2 + 84.8*   |
|                      |               |             |                 |        | -9.4 + 124.6       | -412.0 + 0.0*   | -412.1 + 0.1*   | -130.6 + 89.0*    | <b>50.4 + 15.2</b>  | -12.1 + 4.6*     | -309.0 + 135.5*  |
|                      |               |             |                 |        | -185.6 + 0.0       | -241.2 + 0.7*   | -240.2 + 0.0*   | -1220.8 + 681.9*  | <b>39.6 + 0.0</b>   | 0.4 + 0.0        | -241.0 + 0.0*    |

Table 26: Normalized score for FinRL tasks. For each task, three lines indicate the results of online evaluation, FQE evaluation, WIS evaluation respectively. Bold numbers indicate the best result for each task, while numbers marked by \* indicate results worse than BC. The task name is composed of the specific task, the quality of dataset, and the number of trajectories. L, M, and H stands for low, medium, high respectively. Det. is abbreviation of deterministic.

| Task Name               | Expert Policy | Det. Policy | Behavior Policy | Random | BC                 | BCQ          | PLAS               | CQL                | CRR          | BREMEN               | MOPO        |
|-------------------------|---------------|-------------|-----------------|--------|--------------------|--------------|--------------------|--------------------|--------------|----------------------|-------------|
| FinRL-L-10 <sup>2</sup> | 100           | -13         | -12             | 0      | 34.8 + 60.2        | 23.2 + 7.9*  | 24.2 + 4.2*        | <b>48.3 + 3.5</b>  | 7.5 + 1.0*   | 34.8 + 60.3          | 18.6 + 5.7* |
|                         |               |             |                 |        | 37.5 + 58.2        | 32.9 + 1.4*  | 24.2 + 4.2*        | 30.4 + 17.1*       | 6.7 + 0.0*   | <b>119.9 + 0.1</b>   | 18.6 + 5.7* |
|                         |               |             |                 |        | 34.8 + 60.2        | 26.8 + 9.0*  | 24.4 + 4.9*        | 49.4 + 4.9         | -0.6 + 10.4* | <b>78.8 + 58.3</b>   | 18.8 + 5.5* |
| FinRL-L-10 <sup>3</sup> | 100           | -13         | -12             | 0      | 18.9 + 10.0        | 30.4 + 6.8   | 62.6 + 20.1        | <b>66.2 + 2.3</b>  | 24.7 + 12.3  | 51.7 + 49.5          | 17.6 + 6.5* |
|                         |               |             |                 |        | 11.6 + 9.8         | 37.0 + 2.0   | <b>73.6 + 25.3</b> | 55.5 + 15.0        | 16.1 + 1.0   | 9.6 + 1.4*           | 16.4 + 7.8  |
|                         |               |             |                 |        | 26.1 + 0.5         | 34.7 + 4.6   | <b>56.7 + 24.3</b> | 11.9 + 9.5*        | 26.3 + 10.5  | 21.7 + 3.4*          | 13.9 + 1.8* |
| FinRL-M-10 <sup>2</sup> | 100           | 22          | 35              | 0      | 77.3 + 74.5        | 21.3 + 1.8*  | 33.1 + 19.6*       | <b>84.2 + 27.8</b> | 37.2 + 9.5*  | 77.3 + 74.5          | 21.1 + 6.2* |
|                         |               |             |                 |        | 64.1 + 82.1        | 20.1 + 1.4*  | 24.2 + 22.4*       | <b>71.8 + 37.1</b> | 24.6 + 10.9* | 6.0 + 0.0*           | 25.2 + 5.9* |
|                         |               |             |                 |        | 77.3 + 74.5        | 20.5 + 2.2*  | 29.6 + 20.3*       | 36.2 + 17.0*       | 19.6 + 12.6* | <b>102.1 + 72.2</b>  | 22.9 + 4.5* |
| FinRL-M-10 <sup>3</sup> | 100           | 22          | 35              | 0      | 6.4 + 9.7          | 29.1 + 14.5  | 50.9 + 12.6        | 56.9 + 25.7        | 33.0 + 9.3   | <b>150.3 + 100.0</b> | 20.5 + 5.9  |
|                         |               |             |                 |        | 1.4 + 4.0          | 36.2 + 10.4  | 11.8 + 15.1        | 31.7 + 23.3        | 19.4 + 22.0  | <b>87.5 + 68.8</b>   | 24.8 + 5.7  |
|                         |               |             |                 |        | 14.2 + 7.1         | 31.6 + 12.0  | 42.4 + 18.1        | 38.9 + 29.1        | 22.2 + 22.2  | <b>148.5 + 102.4</b> | 18.1 + 8.0  |
| FinRL-H-10 <sup>2</sup> | 100           | 55          | 50              | 0      | 48.5 + 26.2        | 16.6 + 19.7* | 42.0 + 27.6*       | 57.6 + 27.0        | 43.2 + 20.3* | <b>70.6 + 63.9</b>   | 19.8 + 6.0* |
|                         |               |             |                 |        | <b>69.9 + 14.6</b> | 0.4 + 9.1*   | 41.8 + 15.7*       | 48.8 + 14.0*       | 15.4 + 14.0* | 5.6 + 7.5*           | 16.8 + 1.8* |
|                         |               |             |                 |        | 37.4 + 30.3        | 9.7 + 18.0*  | 22.9 + 29.1*       | 29.8 + 3.7*        | 12.7 + 1.4*  | <b>58.9 + 30.2</b>   | 16.8 + 1.8* |
| FinRL-H-10 <sup>3</sup> | 100           | 55          | 50              | 0      | 14.2 + 26.7        | 22.3 + 19.8  | 52.9 + 16.1        | 51.4 + 20.4        | 35.9 + 23.0  | <b>69.8 + 65.9</b>   | 19.2 + 6.9  |
|                         |               |             |                 |        | 27.6 + 30.5        | 20.0 + 17.8* | <b>46.2 + 2.0</b>  | 45.0 + 1.3         | 34.4 + 19.7  | 6.0 + 30.6*          | 15.9 + 2.9* |
|                         |               |             |                 |        | 0.8 + 11.5         | 19.4 + 18.2  | <b>47.5 + 11.4</b> | 26.3 + 5.1         | 27.4 + 17.2  | 32.8 + 33.8          | 25.1 + 4.4  |

Table 27: Normalized score for CL tasks. For each task, three lines indicate the results of online evaluation, FQE evaluation, WIS evaluation respectively. Bold numbers indicate the best result for each task, while numbers marked by \* indicate results worse than BC. The task name is composed of the specific task, the quality of dataset, and the number of trajectories. L, M, and H stands for low, medium, high respectively. Det. is abbreviation of deterministic.

| Task Name            | Expert Policy | Det. Policy | Behavior Policy | Random | BC                 | BCQ          | PLAS         | CQL               | CRR                | BREMEN             | MOPO        |
|----------------------|---------------|-------------|-----------------|--------|--------------------|--------------|--------------|-------------------|--------------------|--------------------|-------------|
| CL-L-10 <sup>2</sup> | 100           | 35          | 38              | 0      | 30.3 + 10.1        | 17.3 + 3.6*  | 35.1 + 3.4   | 40.1 + 1.4        | <b>44.7 + 0.8</b>  | 27.8 + 9.5*        | 10.8 + 1.6* |
|                      |               |             |                 |        | 16.9 + 0.0         | 20.3 + 1.0   | 12.3 + 0.0*  | 21.7 + 0.0        | <b>42.3 + 2.7</b>  | 17.6 + 0.4         | 9.4 + 1.4*  |
|                      |               |             |                 |        | 25.1 + 11.6        | 17.3 + 3.6*  | 30.5 + 7.3   | 32.0 + 7.8        | <b>39.7 + 3.4</b>  | 16.1 + 1.5*        | 10.2 + 0.6* |
| CL-L-10 <sup>3</sup> | 100           | 35          | 38              | 0      | 38.6 + 1.8         | 25.0 + 1.4*  | 35.8 + 2.5*  | <b>46.9 + 1.5</b> | 41.3 + 2.0         | 40.1 + 1.3         | 10.8 + 1.7* |
|                      |               |             |                 |        | 37.3 + 0.1         | 22.6 + 0.7*  | 25.4 + 0.0*  | <b>39.3 + 0.0</b> | 39.0 + 3.3         | 36.5 + 4.6*        | 11.7 + 0.3* |
|                      |               |             |                 |        | 38.6 + 1.8         | 22.9 + 3.8*  | 27.2 + 2.6*  | <b>38.8 + 2.7</b> | 37.7 + 0.6*        | 33.9 + 4.9*        | 11.4 + 0.5* |
| CL-L-10 <sup>4</sup> | 100           | 35          | 38              | 0      | 38.3 + 1.5         | 21.6 + 0.8*  | 36.9 + 4.1*  | <b>46.4 + 1.7</b> | 42.8 + 0.8         | 39.5 + 1.0         | 10.9 + 2.6* |
|                      |               |             |                 |        | 38.3 + 1.5         | 23.1 + 0.4*  | 22.1 + 0.0*  | <b>41.8 + 0.5</b> | 37.9 + 0.2*        | 37.9 + 0.8*        | 9.7 + 0.0*  |
|                      |               |             |                 |        | 38.3 + 1.5         | 19.9 + 2.6*  | 28.5 + 9.1*  | <b>40.5 + 0.0</b> | 39.9 + 3.4         | 38.3 + 0.2         | 7.9 + 0.1*  |
| CL-M-10 <sup>2</sup> | 100           | 63          | 60              | 0      | 68.3 + 5.6         | 29.9 + 10.5* | 56.9 + 3.9*  | 66.8 + 5.1*       | <b>82.8 + 0.9</b>  | 63.6 + 12.7*       | 10.1 + 2.6* |
|                      |               |             |                 |        | 66.1 + 3.4         | 19.1 + 0.4*  | 43.2 + 22.1* | 45.2 + 10.9*      | <b>75.2 + 6.0</b>  | 24.8 + 7.9*        | 8.9 + 2.3*  |
|                      |               |             |                 |        | 70.7 + 3.1         | 24.2 + 3.6*  | 27.9 + 17.1* | 33.1 + 6.7*       | <b>74.6 + 8.0</b>  | 46.0 + 13.5*       | 9.3 + 0.4*  |
| CL-M-10 <sup>3</sup> | 100           | 63          | 60              | 0      | 63.3 + 8.0         | 24.4 + 3.5*  | 58.5 + 6.2*  | 75.0 + 0.6        | 74.2 + 1.2         | <b>77.7 + 12.5</b> | 10.8 + 1.4* |
|                      |               |             |                 |        | 57.4 + 7.6         | 20.2 + 0.7*  | 35.5 + 17.8* | 58.2 + 0.7        | 74.9 + 1.0         | <b>76.2 + 13.6</b> | 9.0 + 0.1*  |
|                      |               |             |                 |        | 68.2 + 0.0         | 24.3 + 0.9*  | 61.4 + 5.1*  | <b>74.3 + 3.3</b> | 70.2 + 3.0         | 70.2 + 2.3         | 9.0 + 0.3*  |
| CL-M-10 <sup>4</sup> | 100           | 63          | 60              | 0      | 59.4 + 15.8        | 22.1 + 6.6*  | 56.7 + 2.9*  | <b>77.1 + 1.4</b> | 75.4 + 0.6         | 58.7 + 18.7*       | 10.1 + 1.4* |
|                      |               |             |                 |        | 37.1 + 0.0         | 13.1 + 0.0*  | 55.3 + 7.1   | 60.9 + 2.6        | <b>75.3 + 0.7</b>  | 15.5 + 0.3*        | 10.9 + 0.8* |
|                      |               |             |                 |        | 70.0 + 0.0         | 13.0 + 0.0*  | 41.6 + 21.7* | 67.4 + 9.4*       | <b>72.4 + 1.9</b>  | 45.7 + 21.4*       | 7.3 + 0.7*  |
| CL-H-10 <sup>2</sup> | 100           | 94          | 95              | 0      | 110.5 + 6.8        | 31.6 + 13.8* | 88.2 + 5.9*  | 100.8 + 2.4*      | <b>119.3 + 4.8</b> | 112.9 + 6.4        | 11.9 + 0.8* |
|                      |               |             |                 |        | 105.1 + 5.0        | 12.3 + 0.1*  | 24.5 + 1.1*  | 49.2 + 7.6*       | 109.5 + 10.1       | <b>117.4 + 0.8</b> | 10.2 + 1.0* |
|                      |               |             |                 |        | <b>110.5 + 6.8</b> | 30.4 + 3.7*  | 66.8 + 30.3* | 74.0 + 27.1*      | 109.7 + 12.4*      | 81.8 + 44.1*       | 9.9 + 0.9*  |
| CL-H-10 <sup>3</sup> | 100           | 94          | 95              | 0      | 106.7 + 1.6        | 37.5 + 11.5* | 91.7 + 9.3*  | 104.7 + 5.7*      | <b>114.2 + 2.2</b> | 110.7 + 3.8        | 9.9 + 0.7*  |
|                      |               |             |                 |        | <b>108.0 + 0.0</b> | 26.0 + 0.3*  | 20.7 + 0.1*  | 84.6 + 4.2*       | 104.6 + 3.9*       | 75.6 + 9.1*        | 8.2 + 0.3*  |
|                      |               |             |                 |        | 105.6 + 1.7        | 27.7 + 2.2*  | 83.5 + 23.1* | 102.6 + 5.0*      | <b>107.8 + 2.7</b> | 106.3 + 5.2        | 8.5 + 0.4*  |
| CL-H-10 <sup>4</sup> | 100           | 94          | 95              | 0      | 98.5 + 12.4        | 47.1 + 18.2* | 92.5 + 8.7*  | 107.2 + 7.3       | <b>113.0 + 2.8</b> | 79.9 + 44.8*       | 10.8 + 2.7* |
|                      |               |             |                 |        | 89.9 + 12.5        | 46.7 + 1.2*  | 18.5 + 0.0*  | 68.9 + 0.5*       | <b>111.5 + 0.0</b> | 19.1 + 0.7*        | 9.9 + 0.0*  |
|                      |               |             |                 |        | 107.5 + 0.0        | 68.1 + 1.6*  | 97.4 + 0.5*  | 100.6 + 4.7*      | <b>113.3 + 4.0</b> | 94.5 + 25.6*       | 8.8 + 0.4*  |

Table 28: Raw score for HalfCheetah tasks. For each task, three lines indicate the results of online evaluation, FQE evaluation, WIS evaluation respectively. Bold numbers indicate the best result for each task, while numbers marked by \* indicate results worse than BC. The task name is composed of the specific task, the quality of dataset, and the number of trajectories. L, M, and H stands for low, medium, high respectively. Det. is abbreviation of deterministic.

| Task Name                     | Expert Policy | Det. Policy | Behavior Policy | Random | BC                   | BCQ                  | PLAS                  | CQL                   | CRR             | BREMEN                | MOPO                  |
|-------------------------------|---------------|-------------|-----------------|--------|----------------------|----------------------|-----------------------|-----------------------|-----------------|-----------------------|-----------------------|
| HalfCheetah-L-10 <sup>2</sup> | 12284         | 3195        | 2871            | -298   | 3364.8 ± 43.1        | 3499.4 ± 42.6        | 3330.7 ± 51.8*        | 3801.4 ± 33.8         | 3357.0 ± 20.4*  | 4433.0 ± 222.9        | <b>4980.7 ± 231.3</b> |
|                               |               |             |                 |        | 3334.4 ± 43.3        | 3427.5 ± 0.0         | 2915.9 ± 439.6*       | 3667.0 ± 104.7        | 3347.2 ± 0.0    | <b>4298.5 ± 44.0</b>  | 4265.4 ± 242.8        |
|                               |               |             |                 |        | 3395.7 ± 0.0         | 3048.0 ± 198.8*      | 3221.3 ± 23.0*        | 3506.6 ± 201.7        | 3221.9 ± 82.1*  | 4012.2 ± 424.0        | <b>4141.1 ± 546.5</b> |
| HalfCheetah-L-10 <sup>3</sup> | 12284         | 3195        | 2871            | -298   | 3363.8 ± 27.0        | 3993.0 ± 49.9        | 3548.5 ± 3.8          | 4512.4 ± 65.5         | 3372.6 ± 24.4   | 4681.1 ± 230.9        | <b>4741.1 ± 117.2</b> |
|                               |               |             |                 |        | 3350.9 ± 0.0         | 4024.3 ± 0.0         | 3541.5 ± 3.8          | <b>4312.7 ± 83.5</b>  | 3302.4 ± 71.3*  | 2671.5 ± 0.0*         | 2833.0 ± 2432.8*      |
|                               |               |             |                 |        | 3359.9 ± 29.4        | 3696.0 ± 19.9        | 3384.5 ± 0.0          | 3139.3 ± 439.3*       | 3355.9 ± 36.1*  | 2492.1 ± 43.9*        | <b>3916.6 ± 248.0</b> |
| HalfCheetah-L-10 <sup>4</sup> | 12284         | 3195        | 2871            | -298   | 3332.9 ± 17.5        | 4320.2 ± 87.6        | 3549.7 ± 30.1         | <b>4715.6 ± 177.4</b> | 3393.8 ± 65.3   | 4621.9 ± 36.1         | 4442.4 ± 39.9         |
|                               |               |             |                 |        | 3347.2 ± 0.0         | 4189.4 ± 144.2       | 3489.1 ± 57.6         | <b>4606.1 ± 145.3</b> | 3341.2 ± 26.3*  | 4598.1 ± 0.0*         | 2716.5 ± 2347.8*      |
|                               |               |             |                 |        | 3319.9 ± 16.5        | <b>3737.2 ± 88.1</b> | 3446.6 ± 88.3         | 3017.1 ± 543.9*       | 3374.6 ± 36.8   | 2144.8 ± 433.4*       | -599.4 ± 0.0*         |
| HalfCheetah-M-10 <sup>2</sup> | 12284         | 6027        | 5568            | -298   | 5857.0 ± 99.2        | 5134.3 ± 183.9*      | 5573.8 ± 127.2*       | 6190.7 ± 50.5         | 3126.8 ± 73.8*  | 6285.0 ± 626.1        | <b>7635.4 ± 65.6</b>  |
|                               |               |             |                 |        | 5776.8 ± 0.0         | 1209.8 ± 990.1*      | 4005.1 ± 0.0*         | 2820.9 ± 455.6*       | 1864.1 ± 160.4* | 5627.0 ± 0.0*         | <b>6259.0 ± 51.1</b>  |
|                               |               |             |                 |        | 5930.3 ± 94.0        | 5103.6 ± 154.7*      | 5468.6 ± 275.8*       | 4759.8 ± 1433.4*      | 2811.5 ± 589.7* | 5208.7 ± 1408.9*      | <b>6227.9 ± 166.5</b> |
| HalfCheetah-M-10 <sup>3</sup> | 12284         | 6027        | 5568            | -298   | 5866.8 ± 73.6        | 6062.8 ± 12.1        | 6092.3 ± 47.9         | 6576.2 ± 39.1         | 5137.8 ± 328.7* | 6666.9 ± 382.6        | <b>7534.7 ± 134.7</b> |
|                               |               |             |                 |        | 5929.3 ± 0.0         | 5032.2 ± 662.2*      | 3273.8 ± 0.0*         | 2139.0 ± 0.0*         | 3123.3 ± 847.9* | <b>6867.6 ± 0.0</b>   | 4346.6 ± 3498.3*      |
|                               |               |             |                 |        | 5859.5 ± 67.9        | 5373.6 ± 905.3*      | 6112.1 ± 55.3         | 5829.2 ± 447.8*       | 2372.4 ± 29.5*  | 4075.6 ± 1906.1*      | <b>6667.8 ± 214.9</b> |
| HalfCheetah-M-10 <sup>4</sup> | 12284         | 6027        | 5568            | -298   | 5995.9 ± 51.3        | 5944.6 ± 111.2*      | 6091.5 ± 20.3         | 6723.2 ± 115.0        | 5243.8 ± 220.1* | <b>6724.1 ± 402.2</b> | 5195.4 ± 108.5*       |
|                               |               |             |                 |        | 5975.5 ± 0.0         | 3603.8 ± 133.1*      | 3938.6 ± 778.1*       | <b>6647.5 ± 196.8</b> | 2906.2 ± 56.6*  | 5489.9 ± 1224.0*      | 5394.7 ± 106.4*       |
|                               |               |             |                 |        | 5945.8 ± 0.0         | 4914.9 ± 1077.1*     | 6104.5 ± 3.5          | 5251.7 ± 402.2*       | 4984.2 ± 0.0*   | <b>6715.5 ± 0.0</b>   | -592.1 ± 0.0*         |
| HalfCheetah-H-10 <sup>2</sup> | 12284         | 9020        | 7836            | -298   | 5645.0 ± 4006.5      | 6945.7 ± 386.8       | 7781.0 ± 87.9         | <b>9011.7 ± 194.0</b> | 2715.7 ± 201.8* | 3352.0 ± 2859.2*      | 5715.2 ± 1026.3       |
|                               |               |             |                 |        | <b>8459.3 ± 0.0</b>  | 5727.7 ± 0.0*        | 1760.3 ± 416.0*       | -92.0 ± 54.9*         | 824.7 ± 983.2*  | 5640.9 ± 0.0*         | 229.5 ± 104.6*        |
|                               |               |             |                 |        | <b>8471.8 ± 17.6</b> | 3305.6 ± 2519.3*     | 5220.5 ± 2700.7*      | 2452.9 ± 3507.6*      | 1763.7 ± 702.9* | 3034.8 ± 2353.1*      | 2707.6 ± 2313.5*      |
| HalfCheetah-H-10 <sup>3</sup> | 12284         | 9020        | 7836            | -298   | 8676.5 ± 59.5        | 8811.9 ± 44.0        | 9019.3 ± 105.3        | <b>9440.0 ± 166.5</b> | 7569.2 ± 236.6* | 6591.6 ± 2151.4*      | 7994.1 ± 1300.5*      |
|                               |               |             |                 |        | <b>8721.3 ± 8.4</b>  | 1929.2 ± 0.0*        | 3597.3 ± 241.8*       | -270.8 ± 15.8*        | 869.8 ± 0.0*    | 7131.3 ± 1045.9*      | 137.5 ± 533.6*        |
|                               |               |             |                 |        | 8727.2 ± 0.0         | 8161.5 ± 430.1*      | <b>9092.7 ± 106.8</b> | -5.6 ± 129.0*         | 3223.0 ± 736.0* | 3402.1 ± 318.6*       | 1086.3 ± 302.3*       |
| HalfCheetah-H-10 <sup>4</sup> | 12284         | 9020        | 7836            | -298   | 8099.6 ± 344.7       | 8918.9 ± 181.1       | 9192.9 ± 74.3         | <b>9413.0 ± 109.3</b> | 8459.1 ± 55.0   | 1671.5 ± 357.7*       | 657.0 ± 797.0*        |
|                               |               |             |                 |        | <b>8378.9 ± 0.0</b>  | 2780.4 ± 0.0*        | 2061.8 ± 590.8*       | -129.8 ± 0.0*         | 2891.7 ± 68.6*  | 3007.2 ± 0.0*         | -148.9 ± 0.0*         |
|                               |               |             |                 |        | 8306.1 ± 0.0         | 6264.1 ± 2707.3*     | <b>9101.3 ± 0.0</b>   | 8526.8 ± 435.2        | 8448.9 ± 46.3   | 1178.6 ± 419.9*       | -594.1 ± 0.0*         |

Table 29: Raw score for Hopper tasks. For each task, three lines indicate the results of online evaluation, FQE evaluation, WIS evaluation respectively. Bold numbers indicate the best result for each task, while numbers marked by \* indicate results worse than BC. The task name is composed of the specific task, the quality of dataset, and the number of trajectories. L, M, and H stands for low, medium, high respectively. Det. is abbreviation of deterministic.

| Task Name                | Expert Policy | Det. Policy | Behavior Policy | Random | BC                                                             | BCQ                                                  | PLAS                                                | CQL                                                                     | CRR                                                         | BREMEN                                              | MOPO                                           |
|--------------------------|---------------|-------------|-----------------|--------|----------------------------------------------------------------|------------------------------------------------------|-----------------------------------------------------|-------------------------------------------------------------------------|-------------------------------------------------------------|-----------------------------------------------------|------------------------------------------------|
| Hopper-L-10 <sup>2</sup> | 3294          | 508         | 498             | 5      | 533.4 + 21.1<br><b>533.4 + 21.1</b><br>533.4 + 21.1            | 509.6 + 11.3*<br>370.6 + 73.6*<br>403.6 + 0.0*       | 518.6 + 8.4*<br>234.0 + 190.2*<br>328.0 + 94.6*     | <b>548.9 + 15.4</b><br>499.5 + 9.0*<br>528.4 + 25.1*                    | 543.8 + 42.9<br>520.9 + 0.5*<br>529.6 + 7.4*                | 511.5 + 31.1*<br>356.4 + 206.4*<br>40.8 + 1.3*      | 169.1 + 200.8*<br>50.3 + 4.2*<br>38.0 + 22.9*  |
|                          | 3294          | 508         | 498             | 5      | 502.6 + 23.1<br>502.6 + 23.1<br>484.8 + 20.1                   | 601.1 + 6.3<br>494.0 + 124.6*<br>578.9 + 31.9        | 638.9 + 52.3<br><b>602.0 + 52.1</b><br>533.8 + 85.0 | 530.7 + 4.0<br>511.3 + 6.5<br>518.5 + 12.8                              | 557.1 + 20.6<br>566.3 + 72.5<br><b>580.0 + 63.0</b>         | <b>708.8 + 250.7</b><br>74.5 + 14.6*<br>47.4 + 5.3* | 209.9 + 101.1*<br>22.1 + 30.8*<br>125.3 + 0.0* |
|                          | 3294          | 508         | 498             | 5      | 513.2 + 11.3<br>519.7 + 12.6<br>522.1 + 9.2                    | 618.8 + 47.4<br>477.1 + 94.6*<br><b>575.4 + 63.0</b> | 578.8 + 48.5<br>498.4 + 37.0*<br>546.7 + 0.0        | 521.3 + 1.1<br>501.1 + 21.7*<br>472.9 + 2.4*                            | <b>693.6 + 142.3</b><br><b>580.9 + 20.4</b><br>538.7 + 50.2 | 507.5 + 50.3*<br>345.9 + 275.6*<br>276.0 + 0.0*     | 248.2 + 75.5*<br>15.6 + 16.9*<br>25.8 + 19.2*  |
| Hopper-M-10 <sup>2</sup> | 3294          | 1530        | 1410            | 5      | 926.1 + 375.9<br>949.9 + 358.0<br>1203.0 + 358.0               | 1350.2 + 50.5<br>695.1 + 513.2*<br>963.2 + 466.2*    | 1648.8 + 112.6<br>1010.4 + 231.1<br>1010.4 + 231.1* | <b>2084.6 + 308.5</b><br><b>1420.4 + 276.1</b><br><b>2302.2 + 270.5</b> | 1370.3 + 323.5<br>984.0 + 36.6<br>1200.6 + 64.5*            | 942.3 + 207.7<br>213.0 + 136.5*<br>199.2 + 78.0*    | 64.2 + 86.1*<br>38.9 + 23.8*<br>80.9 + 77.1*   |
|                          | 3294          | 1530        | 1410            | 5      | 1692.0 + 894.1<br><b>2344.1 + 863.0</b><br>998.1 + 0.0         | 1573.6 + 364.4*<br>1091.4 + 454.6*<br>1101.8 + 252.9 | 2018.2 + 848.8<br>1068.7 + 222.5*<br>926.4 + 953.9* | <b>2124.8 + 231.8</b><br>1889.7 + 46.9*<br><b>1766.0 + 5.0</b>          | 1576.2 + 346.2*<br>1282.6 + 496.0*<br>1391.0 + 392.5        | 816.5 + 181.7*<br>704.1 + 0.0*<br>704.1 + 0.0*      | 39.0 + 48.8*<br>2.8 + 1.8*<br>4.0 + 0.3*       |
|                          | 3294          | 1530        | 1410            | 5      | 1794.1 + 486.3<br><b>1873.7 + 0.0</b><br><b>2031.1 + 222.6</b> | 1865.5 + 257.5<br>985.6 + 104.0*<br>1021.4 + 30.4*   | 2075.1 + 560.0<br>474.7 + 0.0*<br>246.7 + 161.3*    | <b>2690.3 + 429.8</b><br>1443.7 + 212.8*<br>1348.1 + 81.9*              | 1620.2 + 73.0*<br>1159.9 + 640.3*<br>156.5 + 0.0*           | 1521.7 + 463.0*<br>499.5 + 92.7*<br>551.2 + 128.3*  | 40.6 + 28.2*<br>3.2 + 0.0*<br>0.1 + 2.2*       |
| Hopper-H-10 <sup>2</sup> | 3294          | 2294        | 1551            | 5      | 1465.0 + 406.9<br>1289.2 + 469.6<br>957.2 + 0.0                | 1179.0 + 213.6*<br>443.4 + 476.6*<br>289.2 + 0.0*    | 1892.9 + 228.4<br>360.2 + 90.8*<br>476.8 + 224.6*   | <b>2298.4 + 282.0</b><br><b>1456.5 + 495.1</b><br><b>1518.6 + 381.1</b> | 2162.6 + 420.6<br>1399.3 + 18.3<br>1266.6 + 537.3           | 941.9 + 381.5*<br>5.1 + 0.3*<br>6.1 + 0.0*          | 253.7 + 277.2*<br>4.9 + 2.1*<br>21.0 + 25.2*   |
|                          | 3294          | 2294        | 1551            | 5      | 1424.1 + 271.8<br>1424.1 + 271.8<br>1363.5 + 304.3             | 1691.0 + 336.1<br>821.9 + 721.0*<br>876.2 + 19.2*    | 2504.3 + 149.0<br>862.0 + 304.8*<br>796.3 + 53.6*   | <b>2525.1 + 44.0</b><br><b>1713.0 + 762.2</b><br><b>2280.6 + 147.0</b>  | 1813.9 + 65.8<br>458.4 + 122.9*<br>873.6 + 493.5*           | 1082.2 + 475.8*<br>565.8 + 9.7*<br>1040.3 + 511.2*  | 382.1 + 191.3*<br>5.1 + 1.4*<br>6.2 + 1.1*     |
|                          | 3294          | 2294        | 1551            | 5      | 1633.0 + 464.6<br>1660.2 + 444.2<br>1660.2 + 444.2             | 928.6 + 172.7*<br>437.7 + 595.8*<br>753.3 + 0.0*     | 2178.1 + 330.4<br>894.7 + 205.5*<br>1339.5 + 509.9* | <b>2690.3 + 239.6</b><br><b>2449.9 + 567.9</b><br><b>2886.6 + 152.1</b> | 2058.1 + 163.5<br>982.0 + 1123.1*<br>1263.4 + 941.0*        | 1560.6 + 898.7*<br>504.3 + 0.0*<br>430.5 + 0.0*     | 191.6 + 258.1*<br>3.5 + 3.1*<br>38.8 + 0.0*    |

Table 30: Raw score for Walker2d tasks. For each task, three lines indicate the results of online evaluation, FQE evaluation, WIS evaluation respectively. Bold numbers indicate the best result for each task, while numbers marked by \* indicate results worse than BC. The task name is composed of the specific task, the quality of dataset, and the number of trajectories. L, M, and H stands for low, medium, high respectively. Det. is abbreviation of deterministic.

| Task Name                  | Expert Policy | Det. Policy | Behavior Policy | Random | BC                    | BCQ                   | PLAS                 | CQL                   | CRR                   | BREMEN           | MOPO             |
|----------------------------|---------------|-------------|-----------------|--------|-----------------------|-----------------------|----------------------|-----------------------|-----------------------|------------------|------------------|
| Walker2d-L-10 <sup>2</sup> | 5143          | 1572        | 1278            | 1      | 1495.4 + 179.0        | 1144.9 + 17.9*        | 1696.7 + 263.9       | 1558.6 + 52.2         | <b>1870.9 + 248.4</b> | 1121.7 + 1069.9* | 502.2 + 468.2*   |
|                            |               |             |                 |        | <b>1495.4 + 179.0</b> | 1058.0 + 27.5*        | 549.8 + 24.4*        | 839.0 + 656.1*        | 1393.3 + 214.7*       | 176.5 + 149.7*   | 232.1 + 189.9*   |
|                            |               |             |                 |        | <b>1470.1 + 0.0</b>   | 381.9 + 8.9*          | 539.6 + 126.2*       | 431.8 + 629.3*        | 1457.5 + 372.9*       | 373.3 + 85.7*    | 194.1 + 75.8*    |
| Walker2d-L-10 <sup>3</sup> | 5143          | 1572        | 1278            | 1      | 1466.5 + 99.8         | 1953.6 + 231.6        | 2166.8 + 531.1       | <b>2298.8 + 139.1</b> | 1753.1 + 90.4         | 1667.9 + 449.1   | 599.4 + 725.3*   |
|                            |               |             |                 |        | 1394.7 + 3.5          | 1378.2 + 251.3*       | 855.5 + 1137.9*      | <b>2353.5 + 83.3</b>  | 999.1 + 546.5*        | 453.8 + 255.4*   | 35.9 + 63.2*     |
|                            |               |             |                 |        | 1538.2 + 98.0         | 1508.7 + 511.2*       | 230.4 + 80.0*        | <b>1624.2 + 66.7</b>  | 325.5 + 313.7*        | 639.6 + 247.3*   | 47.2 + 37.2*     |
| Walker2d-L-10 <sup>4</sup> | 5143          | 1572        | 1278            | 1      | 1642.7 + 125.8        | 2010.1 + 186.7        | 1601.7 + 333.4*      | <b>2070.4 + 70.2</b>  | 1710.6 + 373.4        | 1511.7 + 246.3*  | 594.8 + 714.2*   |
|                            |               |             |                 |        | 1681.9 + 0.0          | 1522.6 + 326.1*       | 4.9 + 31.2*          | <b>2008.5 + 0.0</b>   | 1526.6 + 52.8*        | 71.1 + 22.6*     | -7.5 + 1.5*      |
|                            |               |             |                 |        | 1542.5 + 98.6         | <b>1983.8 + 0.0</b>   | 71.6 + 80.1*         | 1703.4 + 0.0          | 1561.0 + 568.2        | 126.2 + 61.3*    | -14.6 + 5.5*     |
| Walker2d-M-10 <sup>2</sup> | 5143          | 2547        | 2221            | 1      | 2582.2 + 205.5        | 2159.3 + 53.8*        | 2652.5 + 89.8        | <b>2734.1 + 129.0</b> | 2033.3 + 246.3*       | 1936.4 + 1365.2* | 1036.5 + 796.8*  |
|                            |               |             |                 |        | <b>2582.2 + 205.5</b> | 449.7 + 30.4*         | 1346.3 + 928.2*      | 1912.6 + 477.4*       | 1857.0 + 359.9*       | 789.8 + 575.4*   | 456.7 + 363.8*   |
|                            |               |             |                 |        | 2438.2 + 3.6          | 2028.1 + 147.7*       | <b>2761.9 + 0.0</b>  | 2461.5 + 159.9        | 1724.7 + 389.2*       | 727.8 + 1032.0*  | 24.2 + 62.0*     |
| Walker2d-M-10 <sup>3</sup> | 5143          | 2547        | 2221            | 1      | 2503.3 + 97.9         | <b>3173.7 + 27.8</b>  | 1778.7 + 679.5*      | 2947.7 + 49.7         | 2300.4 + 354.3*       | 1927.8 + 852.2*  | 2051.9 + 104.6*  |
|                            |               |             |                 |        | <b>2448.2 + 109.9</b> | 2435.4 + 534.0*       | -16.0 + 1.3*         | 2356.2 + 30.7*        | 1761.4 + 192.3*       | 157.3 + 22.8*    | 629.8 + 364.7*   |
|                            |               |             |                 |        | 2503.3 + 97.9         | <b>2708.8 + 503.2</b> | -9.4 + 6.8*          | 2501.3 + 402.4*       | 520.6 + 587.4*        | 1264.4 + 725.9*  | -5.5 + 0.0*      |
| Walker2d-M-10 <sup>4</sup> | 5143          | 2547        | 2221            | 1      | 2795.7 + 178.4        | <b>3095.9 + 73.7</b>  | 2444.1 + 77.7*       | 3016.4 + 62.3         | 2816.9 + 126.5        | 2132.7 + 116.2*  | 1642.6 + 1045.4* |
|                            |               |             |                 |        | <b>2886.3 + 75.7</b>  | 2652.3 + 583.5*       | 9.7 + 17.5*          | 556.2 + 327.1*        | 1983.3 + 131.4*       | 516.8 + 74.7*    | 276.4 + 396.9*   |
|                            |               |             |                 |        | 2832.7 + 0.0          | <b>3011.8 + 236.9</b> | 53.8 + 87.0*         | 2413.8 + 200.8*       | 2049.4 + 56.6*        | 977.0 + 797.7*   | 947.1 + 1190.3*  |
| Walker2d-H-10 <sup>2</sup> | 5143          | 3550        | 2936            | 1      | 3299.0 + 252.8        | 2448.0 + 229.6*       | 3376.7 + 30.5        | <b>3822.1 + 14.2</b>  | 761.1 + 311.6*        | 1250.8 + 1642.4* | 1195.7 + 185.7*  |
|                            |               |             |                 |        | 3448.4 + 280.0        | 1001.8 + 811.0*       | 245.0 + 233.5*       | <b>3776.1 + 58.6</b>  | 595.9 + 213.9*        | 173.9 + 0.0*     | 763.5 + 496.5*   |
|                            |               |             |                 |        | 3149.5 + 68.7         | 1970.6 + 647.6*       | <b>3382.6 + 25.5</b> | 3065.4 + 201.9*       | 622.5 + 195.9*        | 337.0 + 226.0*   | 595.8 + 146.1*   |
| Walker2d-H-10 <sup>3</sup> | 5143          | 3550        | 2936            | 1      | 3736.5 + 213.8        | <b>3939.4 + 146.1</b> | 2930.5 + 480.9*      | 3870.9 + 95.7         | 3453.2 + 495.2*       | 2470.9 + 1057.8* | 924.0 + 153.6*   |
|                            |               |             |                 |        | <b>3826.0 + 0.0</b>   | 3583.9 + 369.1*       | -15.7 + 0.5*         | 1703.1 + 637.6*       | 2975.7 + 581.1*       | 935.4 + 471.2*   | -8.5 + 1.9*      |
|                            |               |             |                 |        | 3697.9 + 181.2        | <b>3743.3 + 89.3</b>  | 1101.2 + 1582.8*     | 3132.0 + 520.0*       | 3187.1 + 566.9*       | 1684.3 + 842.9*  | -10.6 + 0.0*     |
| Walker2d-H-10 <sup>4</sup> | 5143          | 3550        | 2936            | 1      | 3000.9 + 429.7        | <b>4007.1 + 71.1</b>  | 1866.3 + 230.8*      | 3850.6 + 42.5         | 3685.9 + 361.3        | 2470.3 + 487.2*  | 910.4 + 43.5*    |
|                            |               |             |                 |        | <b>3093.5 + 479.9</b> | 2655.0 + 838.8*       | 76.8 + 130.9*        | 2217.5 + 1026.9*      | 767.0 + 1088.1*       | 236.5 + 195.2*   | 65.6 + 168.8*    |
|                            |               |             |                 |        | 3432.9 + 0.0          | <b>4078.7 + 3.0</b>   | 93.3 + 0.0*          | 3806.9 + 66.0         | 3796.7 + 413.2        | 98.4 + 0.0*      | 401.2 + 386.0*   |

Table 31: Raw score for IB tasks. For each task, three lines indicate the results of online evaluation, FQE evaluation, WIS evaluation respectively. Bold numbers indicate the best result for each task, while numbers marked by \* indicate results worse than BC. The task name is composed of the specific task, the quality of dataset, and the number of trajectories. L, M, and H stands for low, medium, high respectively. Det. is abbreviation of deterministic.

| Task Name            | Expert Policy | Det. Policy | Behavior Policy | Random  | BC                                                                      | BCQ                                                                  | PLAS                                                                      | CQL                                                                        | CRR                                                                                | BREMEN                                                                   | MOPO                                                                    |
|----------------------|---------------|-------------|-----------------|---------|-------------------------------------------------------------------------|----------------------------------------------------------------------|---------------------------------------------------------------------------|----------------------------------------------------------------------------|------------------------------------------------------------------------------------|--------------------------------------------------------------------------|-------------------------------------------------------------------------|
| IB-L-10 <sup>2</sup> | -180240       | -344311     | -344311         | -317624 | -344761.7 + 2189.9<br>-344010.5 + 2518.4<br><b>-344010.5 + 2518.4</b>   | -712660.8 + 213594.5*<br>-410980.4 + 0.0*<br>-882595.2 + 159.0*      | -365620.4 + 32376.3*<br>-411022.0 + 54.0*<br>-568695.2 + 223249.5*        | <b>-314124.0 + 4338.2</b><br>-40726.1 + 0.0*<br>-523939.1 + 221024.0*      | -324878.5 + 19785.4<br><b>-342228.8 + 5426.2</b><br>-528695.9 + 249141.0*          | -365081.2 + 33973.5*<br>-2514183.4 + 0.0*<br>-450899.9 + 61330.4*        | -566237.9 + 223483.5*<br>-2658538.0 + 628.8*<br>-648459.8 + 192663.8*   |
| IB-L-10 <sup>3</sup> | -180240       | -344311     | -344311         | -317624 | -339937.4 + 3645.8<br><b>-337435.8 + 207.1</b><br>-345087.1 + 0.0       | -561099.6 + 213072.1*<br>-411067.4 + 380.0*<br>-411336.1 + 380.0*    | -359489.8 + 36380.4*<br>-411180.5 + 30.6*<br>-411180.5 + 30.6*            | <b>-318117.5 + 6148.1</b><br>-391534.8 + 38114.8*<br>-563498.4 + 192211.8* | -324936.1 + 23527.7<br>-347386.4 + 13984.6*<br><b>-337748.6 + 25050.1</b>          | -368816.0 + 29642.4*<br>-344129.4 + 8507.8*<br>-707684.5 + 0.0*          | -542129.0 + 244107.3*<br>-2658827.7 + 367.7*<br>-1909782.3 + 1060017.9* |
| IB-L-10 <sup>4</sup> | -180240       | -344311     | -344311         | -317624 | -343210.4 + 4055.4<br><b>-348684.4 + 0.0</b><br>-342222.6 + 4569.2      | -561638.9 + 213473.5*<br>-411269.4 + 108.5*<br>-410884.1 + 266.8*    | -518946.1 + 258148.7*<br>-411215.8 + 331.2*<br>-568326.4 + 223146.3*      | -326129.3 + 19145.8<br>-503697.6 + 136754.9*<br><b>-312506.4 + 3855.2</b>  | <b>-319686.8 + 16332.2</b><br>-383450.3 + 29621.1*<br>-341559.8 + 0.0              | -486088.4 + 63556.2*<br>-456833.6 + 31807.7*<br>-411850.7 + 0.0*         | -553469.5 + 235120.3*<br>-1909064.2 + 1059572.7*<br>-320385.5 + 0.0     |
| IB-M-10 <sup>2</sup> | -180240       | -283121     | -283121         | -317624 | -330246.8 + 64458.5<br>-292685.3 + 0.0<br><b>-282292.2 + 7349.0</b>     | -561785.5 + 213250.4*<br>-410853.0 + 134.2*<br>-568506.2 + 222892.9* | -718368.5 + 220349.4*<br>-568521.1 + 222562.0*<br>-726813.5 + 223210.8*   | -284143.4 + 6669.0<br>-355898.0 + 29505.0*<br>-490209.9 + 256942.6*        | <b>-282481.3 + 5208.6</b><br><b>-288604.9 + 0.0</b><br>-321847.6 + 57271.1*        | -451975.5 + 143006.8*<br>-797642.7 + 0.0*<br>-612565.6 + 432657.5*       | -399812.5 + 7797.9*<br>-626245.1 + 193554.9*<br>-1159253.2 + 1059689.4* |
| IB-M-10 <sup>3</sup> | -180240       | -283121     | -283121         | -317624 | -280375.7 + 558.5<br><b>-281093.4 + 0.0</b><br><b>-280112.1 + 269.3</b> | -567089.1 + 221151.5*<br>-410678.6 + 299.6*<br>-726046.4 + 222700.2* | -568661.4 + 222473.2*<br>-410490.8 + 0.0*<br>-883615.3 + 466.0*           | -283066.3 + 2155.5*<br>-64340.7 + 0.0*<br>-282024.8 + 1612.8*              | <b>-277867.7 + 4022.3</b><br>-305740.2 + 0.0*<br>-312046.3 + 2035.2*               | -339595.9 + 44727.3*<br>-602386.8 + 160945.3*<br>-312046.3 + 2035.2*     | -481452.0 + 117723.5*<br>-410133.7 + 41.9*<br>-486741.5 + 110201.3*     |
| IB-M-10 <sup>4</sup> | -180240       | -283121     | -283121         | -317624 | -279500.8 + 3683.9<br>-277271.0 + 895.8<br>-280134.2 + 3153.4           | -566925.8 + 224088.0*<br>-410798.5 + 151.7*<br>-410605.6 + 412.9*    | -568501.1 + 222914.8*<br>-410619.4 + 0.0*<br>-410619.4 + 0.0*             | -280729.5 + 8810.7*<br>-394629.5 + 17923.3*<br>-337979.7 + 44268.3*        | <b>-275867.2 + 599.8</b><br><b>-274633.4 + 0.0</b><br><b>-278415.0 + 3797.9</b>    | -315430.2 + 25323.7*<br>-279422.7 + 454.7*<br>-861522.7 + 0.0*           | -384687.7 + 35961.9*<br>-2658889.2 + 0.0*<br>-2658889.2 + 0.0*          |
| IB-H-10 <sup>2</sup> | -180240       | -220156     | -220156         | -317624 | -238255.2 + 41897.6<br><b>-218726.7 + 0.0</b><br>-231870.5 + 45676.1    | -714139.4 + 105782.0*<br>-147476.7 + 836850.3*<br>-649128.2 + 328.8* | -562798.2 + 107829.8*<br>-569125.3 + 222954.3*<br>-1134395.0 + 1023028.0* | -272439.9 + 37056.6*<br>-510704.8 + 263728.2*<br>-352046.2 + 93275.8*      | <b>-217115.0 + 173.9</b><br>-995874.5 + 1101348.1*<br><b>-217558.2 + 172.2</b>     | -440008.5 + 149038.2*<br>-176692.1 + 628919.3*<br>-1432446.8 + 955206.6* | -423373.3 + 96169.4*<br>-687799.3 + 200914.1*<br>-477191.2 + 106725.4*  |
| IB-H-10 <sup>3</sup> | -180240       | -220156     | -220156         | -317624 | -304761.7 + 120946.8<br>-361090.7 + 107008.9<br>-446940.8 + 40816.6     | -726915.6 + 110848.7*<br>-864952.4 + 0.0*<br>-649403.4 + 0.0*        | -553143.3 + 201107.2*<br>-411240.4 + 282.5*<br>-726668.3 + 110379.9*      | -296295.2 + 67178.7<br>-545224.5 + 118751.8*<br>-1108589.6 + 455436.8*     | <b>-221840.5 + 152.2</b><br><b>-221950.0 + 0.0</b><br><b>-218444.2 + 652.3</b>     | -360952.6 + 155810.4*<br>-475409.2 + 116752.7*<br>-1891941.4 + 944473.7* | -451568.8 + 123100.2*<br>-535490.3 + 157894.3*<br>-646042.5 + 4369.4*   |
| IB-H-10 <sup>4</sup> | -180240       | -220156     | -220156         | -317624 | -364645.1 + 152919.1<br>-330487.1 + 171238.7<br>-572655.2 + 912.7*      | -569215.6 + 111876.4*<br>-883653.4 + 0.0*<br>-648956.2 + 912.7*      | -571397.9 + 112758.7*<br>-883833.5 + 173.4*<br>-647685.7 + 0.0*           | -270589.9 + 46831.4<br>-497089.6 + 122231.0*<br>-1994869.7 + 936859.5*     | <b>-232892.3 + 21416.0</b><br><b>-248358.5 + 20928.1</b><br><b>-263156.9 + 0.0</b> | -325249.6 + 15788.0<br>-334292.3 + 6358.7*<br>-317105.0 + 0.0            | -492383.6 + 116498.6*<br>-742097.7 + 186183.2*<br>-648666.8 + 0.0*      |

Table 32: Raw score for FinRL tasks. For each task, three lines indicate the results of online evaluation, FQE evaluation, WIS evaluation respectively. Bold numbers indicate the best result for each task, while numbers marked by \* indicate results worse than BC. The task name is composed of the specific task, the quality of dataset, and the number of trajectories. L, M, and H stands for low, medium, high respectively. Det. is abbreviation of deterministic.

| Task Name               | Expert Policy | Det. Policy | Behavior Policy | Random | BC                  | BCQ           | PLAS                 | CQL                  | CRR           | BREMEN               | MOPO          |
|-------------------------|---------------|-------------|-----------------|--------|---------------------|---------------|----------------------|----------------------|---------------|----------------------|---------------|
| FinRL-L-10 <sup>2</sup> | 631           | 150         | 152             | 206    | 353.8 + 256.0       | 304.8 + 33.5* | 308.9 + 17.7*        | <b>411.3 + 15.0</b>  | 237.8 + 4.4*  | 354.0 + 256.3        | 285.2 + 24.2* |
|                         |               |             |                 |        | 365.5 + 247.4       | 346.0 + 5.9*  | 308.9 + 17.7*        | 335.1 + 72.5*        | 234.6 + 0.1*  | <b>715.6 + 0.3</b>   | 285.0 + 24.3* |
|                         |               |             |                 |        | 353.8 + 256.0       | 320.0 + 38.1* | 309.5 + 20.8*        | 415.8 + 20.7         | 203.5 + 44.2* | <b>540.8 + 247.7</b> | 286.0 + 23.2* |
| FinRL-L-10 <sup>3</sup> | 631           | 150         | 152             | 206    | 286.2 + 42.6        | 335.2 + 28.7  | 471.9 + 85.5         | <b>487.5 + 9.8</b>   | 310.8 + 52.1  | 425.6 + 210.5        | 280.8 + 27.7* |
|                         |               |             |                 |        | 255.4 + 41.6        | 363.3 + 8.7   | <b>518.8 + 107.4</b> | 441.7 + 63.7         | 274.3 + 4.4   | 247.0 + 6.0*         | 275.7 + 33.1  |
|                         |               |             |                 |        | 317.1 + 2.0         | 353.5 + 19.6  | <b>446.8 + 103.3</b> | 256.5 + 40.4*        | 317.6 + 44.6  | 298.1 + 14.4*        | 264.9 + 7.8*  |
| FinRL-M-10 <sup>2</sup> | 631           | 300         | 357             | 206    | 534.7 + 316.5       | 296.7 + 7.7*  | 346.8 + 83.2*        | <b>563.8 + 118.0</b> | 364.2 + 40.3* | 534.7 + 316.5        | 295.6 + 26.2* |
|                         |               |             |                 |        | 478.3 + 348.8       | 291.5 + 5.8*  | 308.9 + 95.0*        | <b>511.2 + 157.8</b> | 310.5 + 46.4* | 231.6 + 0.0*         | 312.9 + 25.2* |
|                         |               |             |                 |        | 534.7 + 316.5       | 293.1 + 9.3*  | 331.6 + 86.3*        | 359.7 + 72.1*        | 289.5 + 53.5* | <b>639.8 + 306.9</b> | 303.5 + 19.3* |
| FinRL-M-10 <sup>3</sup> | 631           | 300         | 357             | 206    | 233.2 + 41.3        | 329.8 + 61.7  | 422.2 + 53.7         | 448.0 + 109.3        | 346.4 + 39.4  | <b>844.8 + 425.0</b> | 293.0 + 25.2  |
|                         |               |             |                 |        | 211.8 + 16.9        | 359.7 + 44.3  | 256.2 + 64.3         | 340.9 + 99.1         | 288.4 + 93.4  | <b>577.7 + 292.2</b> | 311.5 + 24.2  |
|                         |               |             |                 |        | 266.5 + 30.2        | 340.2 + 51.1  | 386.2 + 77.0         | 371.5 + 123.5        | 300.5 + 94.2  | <b>837.2 + 435.3</b> | 283.1 + 33.9  |
| FinRL-H-10 <sup>2</sup> | 631           | 441         | 419             | 206    | 412.1 + 111.4       | 276.7 + 83.6* | 384.5 + 117.3*       | 450.8 + 114.8        | 389.7 + 86.2* | <b>506.1 + 271.7</b> | 290.3 + 25.5* |
|                         |               |             |                 |        | <b>503.1 + 62.2</b> | 207.7 + 38.6* | 383.7 + 66.9*        | 413.6 + 59.5*        | 271.3 + 59.7* | 229.9 + 31.9*        | 277.2 + 7.7*  |
|                         |               |             |                 |        | 365.1 + 128.6       | 247.2 + 76.4* | 303.5 + 123.5*       | 332.7 + 15.7*        | 259.8 + 6.1*  | <b>456.2 + 128.5</b> | 277.2 + 7.7*  |
| FinRL-H-10 <sup>3</sup> | 631           | 441         | 419             | 206    | 266.3 + 113.3       | 300.7 + 84.1  | 430.7 + 68.4         | 424.3 + 86.5         | 358.5 + 97.9  | <b>502.8 + 280.1</b> | 287.7 + 29.2  |
|                         |               |             |                 |        | 323.2 + 129.5       | 290.9 + 75.7* | <b>402.2 + 8.3</b>   | 397.3 + 5.5          | 352.2 + 83.8  | 231.6 + 130.2*       | 273.6 + 12.3* |
|                         |               |             |                 |        | 209.3 + 48.9        | 288.3 + 77.5  | <b>407.9 + 48.5</b>  | 317.7 + 21.6         | 322.6 + 73.3  | 345.5 + 143.7        | 312.8 + 18.5  |



Table 33: Raw score for CL tasks. For each task, three lines indicate the results of online evaluation, FQE evaluation, WIS evaluation respectively. Bold numbers indicate the best result for each task, while numbers marked by \* indicate results worse than BC. The task name is composed of the specific task, the quality of dataset, and the number of trajectories. L, M, and H stands for low, medium, high respectively. Det. is abbreviation of deterministic.

| Task Name            | Expert Policy | Det. Policy | Behavior Policy | Random | BC                      | BCQ               | PLAS               | CQL                     | CRR                     | BREMEN                  | MOPO             |
|----------------------|---------------|-------------|-----------------|--------|-------------------------|-------------------|--------------------|-------------------------|-------------------------|-------------------------|------------------|
| CL-L-10 <sup>2</sup> | 50350         | 28500       | 29514           | 16280  | 26603.8 + 3453.2        | 22179.4 + 1237.0* | 28246.0 + 1170.6   | 29928.2 + 478.7         | <b>31525.3 + 279.7</b>  | 25749.4 + 3234.2*       | 19961.2 + 550.7* |
|                      |               |             |                 |        | 22052.9 + 0.0           | 23207.1 + 348.2   | 20456.1 + 0.0*     | 23673.5 + 0.0           | <b>30684.6 + 909.3</b>  | 22287.6 + 152.9         | 19488.7 + 489.8* |
|                      |               |             |                 |        | 24839.8 + 3941.2        | 22179.4 + 1237.0* | 26659.8 + 2475.5   | 27187.2 + 2653.9        | <b>29799.5 + 1142.3</b> | 21778.2 + 512.5*        | 19765.2 + 193.8* |
| CL-L-10 <sup>3</sup> | 50350         | 28500       | 29514           | 16280  | 29439.4 + 614.6         | 24786.0 + 484.9*  | 28482.5 + 863.4*   | <b>32265.3 + 500.3</b>  | 30334.9 + 670.7         | 29935.4 + 449.6         | 19957.8 + 562.9* |
|                      |               |             |                 |        | 28997.7 + 20.9          | 23983.1 + 254.7*  | 24920.0 + 0.0*     | <b>29672.8 + 16.9</b>   | 29557.3 + 1126.9        | 28706.8 + 1566.6*       | 20261.9 + 106.4* |
|                      |               |             |                 |        | 29439.4 + 614.6         | 24098.2 + 1295.0* | 25537.9 + 873.9*   | <b>29488.9 + 921.6</b>  | 29112.3 + 196.2*        | 27842.5 + 1684.8*       | 20159.0 + 167.8* |
| CL-L-10 <sup>4</sup> | 50350         | 28500       | 29514           | 16280  | 29345.4 + 522.6         | 23627.0 + 266.5*  | 28845.1 + 1410.7*  | <b>32079.7 + 572.1</b>  | 30869.8 + 263.6         | 29747.4 + 352.2         | 19980.0 + 872.8* |
|                      |               |             |                 |        | 29345.4 + 522.6         | 24133.2 + 150.9*  | 23795.0 + 0.0*     | <b>30504.8 + 174.5</b>  | 29177.7 + 80.3*         | 29186.0 + 269.5*        | 19582.4 + 0.0*   |
|                      |               |             |                 |        | 29345.4 + 522.6         | 23060.6 + 890.4*  | 25988.5 + 3102.1*  | <b>30066.9 + 0.0</b>    | 29874.1 + 1145.4        | 29328.3 + 68.2*         | 18983.9 + 42.2*  |
| CL-M-10 <sup>2</sup> | 50350         | 37800       | 36900           | 16280  | 39546.5 + 1922.6        | 26460.1 + 3564.4* | 35682.4 + 1315.7*  | 39054.2 + 1726.5*       | <b>44500.7 + 300.4</b>  | 37947.5 + 4318.3*       | 19731.3 + 881.1* |
|                      |               |             |                 |        | 38794.9 + 1156.5        | 22792.6 + 137.6*  | 30986.0 + 7513.9*  | 31677.2 + 3720.2*       | <b>41893.8 + 2028.6</b> | 24715.6 + 2688.8*       | 19314.4 + 786.7* |
|                      |               |             |                 |        | 40364.2 + 1062.9        | 24541.9 + 1225.4* | 25772.6 + 5832.2*  | 27561.4 + 2285.6*       | <b>41684.7 + 2741.3</b> | 31941.2 + 4602.8*       | 19460.4 + 146.0* |
| CL-M-10 <sup>3</sup> | 50350         | 37800       | 36900           | 16280  | 37863.2 + 2738.8        | 24598.1 + 1188.5* | 36195.6 + 2107.8*  | 41820.2 + 216.7         | 41549.5 + 399.4         | <b>42765.6 + 4271.8</b> | 19945.1 + 466.5* |
|                      |               |             |                 |        | 35839.0 + 2595.3        | 23173.8 + 239.6*  | 28364.7 + 6063.1*  | 36102.6 + 234.3         | 41801.4 + 323.7         | <b>42235.7 + 4646.5</b> | 19357.5 + 39.0*  |
|                      |               |             |                 |        | 39509.3 + 0.0           | 24550.7 + 320.2*  | 37189.0 + 1722.1*  | <b>41586.1 + 1138.1</b> | 40198.9 + 1005.7        | 40182.1 + 776.7         | 19357.6 + 86.2*  |
| CL-M-10 <sup>4</sup> | 50350         | 37800       | 36900           | 16280  | 36507.0 + 5368.8        | 23803.5 + 2241.1* | 35587.0 + 986.1*   | <b>42531.8 + 491.7</b>  | 41974.6 + 220.7         | 36273.5 + 6371.8*       | 19730.2 + 483.8* |
|                      |               |             |                 |        | 28916.8 + 0.0           | 20727.4 + 0.0*    | 35124.8 + 2424.5   | 37025.2 + 898.6         | <b>41922.7 + 248.1</b>  | 21555.0 + 116.2*        | 20010.3 + 286.8* |
|                      |               |             |                 |        | 40136.7 + 0.0           | 20707.9 + 0.0*    | 30467.8 + 7399.4*  | 39241.9 + 3200.9*       | <b>40959.7 + 631.3</b>  | 31854.5 + 7296.1*       | 18761.1 + 247.4* |
| CL-H-10 <sup>2</sup> | 50350         | 48600       | 48818           | 16280  | 53943.8 + 2305.0        | 27062.8 + 4698.8* | 46322.6 + 1994.3*  | 50611.7 + 827.5*        | <b>56935.0 + 1635.5</b> | 54739.3 + 2173.2        | 20322.5 + 268.4* |
|                      |               |             |                 |        | 52089.0 + 1702.4        | 20468.1 + 44.3*   | 24629.8 + 360.3*   | 33029.6 + 2574.9*       | 53586.0 + 3431.2        | <b>56282.5 + 279.6</b>  | 19742.5 + 337.8* |
|                      |               |             |                 |        | <b>53943.8 + 2305.0</b> | 26627.1 + 1246.0* | 39026.6 + 10330.9* | 41502.8 + 9248.0*       | 53671.2 + 4224.4*       | 44156.9 + 15029.4*      | 19668.0 + 299.3* |
| CL-H-10 <sup>3</sup> | 50350         | 48600       | 48818           | 16280  | 52621.9 + 555.1         | 29071.0 + 3907.4* | 47516.9 + 3168.9*  | 51960.6 + 1946.3*       | <b>55180.4 + 755.5</b>  | 54011.1 + 1307.0        | 19657.1 + 249.5* |
|                      |               |             |                 |        | <b>53086.4 + 0.0</b>    | 25137.9 + 104.7*  | 23338.1 + 41.2*    | 45099.0 + 1422.0*       | 51928.8 + 1319.2*       | 42022.7 + 3099.3*       | 19078.0 + 97.6*  |
|                      |               |             |                 |        | 52256.5 + 586.8         | 25720.6 + 760.1*  | 44729.5 + 7872.6*  | 51239.6 + 1716.9*       | <b>53003.4 + 910.1</b>  | 52480.2 + 1764.7        | 19191.3 + 153.2* |
| CL-H-10 <sup>4</sup> | 50350         | 48600       | 48818           | 16280  | 49844.1 + 4217.6        | 32323.4 + 6191.3* | 47798.9 + 2952.2*  | 52814.9 + 2485.0        | <b>54777.5 + 968.6</b>  | 43514.7 + 15253.5*      | 19954.6 + 915.1* |
|                      |               |             |                 |        | 46893.9 + 4261.5        | 32175.5 + 401.8*  | 22587.6 + 0.0*     | 39742.9 + 166.3*        | <b>54268.7 + 0.0</b>    | 22785.9 + 238.8*        | 19658.0 + 0.0*   |
|                      |               |             |                 |        | 52920.5 + 0.0           | 39473.3 + 544.8*  | 49472.0 + 168.6*   | 50544.4 + 1591.3*       | <b>54896.1 + 1371.4</b> | 48462.3 + 8717.9*       | 19276.6 + 122.3* |
